# Supplementary material for: Efficient synthesis of (S,R)-Bn-Yanphos and Rh/(S,R)-Bn-Yanphos catalyzed asymmetric hydroformylation of vinyl heteroarenes
Source: Royal Society of Chemistry journal article supplement (doi:10.1039/c6qo00641h), 2016-12-06
Supplement: c6qo00641h1.pdf [file c6qo00641h1.pdf]

## Efficient Synthesis of (*S,R*)- Bn-Yanphos and Rh/ (*S,R*)- Bn-Yanphos Catalyzed Asymmetric Hydroformylation of Vinyl Heteroarenes

### Table of Contents

|                                                                       |    |
|-----------------------------------------------------------------------|----|
| 1. General Information.....                                           | 2  |
| 2. Procedures for the preparation of ( <i>S,R</i> )- Bn-Yanphos ..... | 2  |
| 3. Procedures for the preparation of substrates.....                  | 6  |
| 4. General procedure for asymmetric hydroformylation .....            | 10 |
| 5. Reduction of Aldehydes.....                                        | 11 |
| 6. Characterizations of compounds.....                                | 11 |
| 7. Procedures for the preparation of ( <i>S</i> )-IPA .....           | 15 |
| 8. References.....                                                    | 17 |
| 9. NMR spectra of compound.....                                       | 17 |
| 10. HPLC spectra for ee determination .....                           | 28 |

## 1. General Information

All reactions and manipulations that were sensitive to moisture or air were performed in a nitrogen-filled glovebox or using standard Schlenk techniques, unless otherwise noted. Solvents were dried with standard procedures, degassed with N<sub>2</sub> and transferred by syringe. NMR spectra were recorded on Bruker ADVANCE III (400 MHz) spectrometers for <sup>1</sup>H NMR and <sup>13</sup>C NMR. CDCl<sub>3</sub> was the solvent used for the NMR analysis, with tetramethylsilane as the internal standard. Chemical shifts were reported upfield to TMS (0.00 ppm) for <sup>1</sup>H NMR and relative to CDCl<sub>3</sub> (77.3 ppm) for <sup>13</sup>C NMR. Optical rotation was determined using a Perkin Elmer 343 polarimeter. HPLC analysis was conducted on an Agilent 1260 Series instrument. GC analysis was carried out on Angilent 1200 Series instrument using chiral capillary columns. Column Chromatography was performed with silica gel Merck 60 (300-400 mesh). Thin layer chromatography (TLC) was performed on EM reagents 0.25 mm silica 60-F plates. All new products were further characterized by HRMS. A positive ion mass spectrum of sample was acquired on a Thermo LTQ-FT mass spectrometer with an electrospray ionization source.

## 2. Procedures for the preparation of (S,R)- Bn-Yanphos

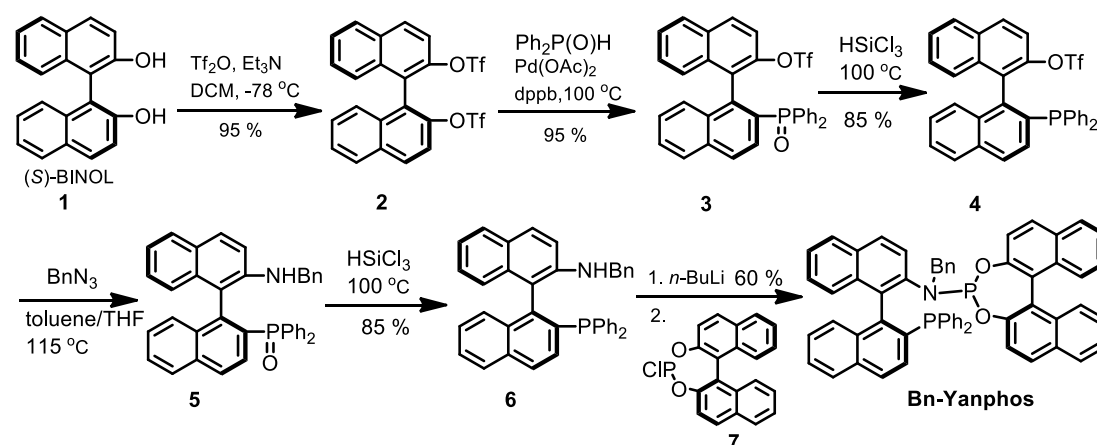

(S)-[1,1'-binaphthalene]-2,2'-diyl bis(trifluoromethanesulfonate) (2)

A single necked flask charged with a solution of (*S*)-BINOL (**1**) (14.3 g, 50 mmol) and Et<sub>3</sub>N (15.2 g, 20.9 mL, 150 mmol) in CH<sub>2</sub>Cl<sub>2</sub> (125 mL) was cooled to -78 °C, and Tf<sub>2</sub>O (31.0 g, 18.5 mL, 110 mmol) was added dropwise. Then the resulting mixture was warmed to 0 °C for 2 h. After removal of the solvent under vacuum, the resulting thick residue was filtrated through a short silica gel column and flushed with petroleum ether/ethyl acetate (5:1, v/v). The filtrate was concentrated under reduce pressure, and the product **2** was obtained as a white solid (27.5 g, >99% yield) and used for the next step without further purification.<sup>[1]</sup> <sup>1</sup>H NMR (400 MHz, CDCl<sub>3</sub>) δ/ppm = 7.27(d, *J* = 8.5 Hz, 2H), 7.42(ddd, *J* = 1.1 Hz, 6.8 Hz, 8.2 Hz, 2H), 7.59(ddd, *J* = 1.0 Hz, 7.0 Hz, 8.1 Hz, 2H), 7.63(d, *J* = 9.1 Hz, 2H), 8.02(d, *J* = 8.2 Hz, 2H), 8.15(d, *J* = 9.1 Hz, 2H); <sup>13</sup>C NMR(100 MHz, CDCl<sub>3</sub>) δ: 118.3, 119.4, 123.6, 126.8, 127.4, 128.1, 132.1, 132.5, 133.2, 145.5.

**(*S*)-2'-(diphenylphosphoryl)-[1,1'-binaphthalen]-2-yl trifluoromethanesulfonate**  
**(3)**

To a schlenk flask charged with **2** (1.10 g, 2.0 mmol), diphenylphosphine oxide (0.81 g, 4 mmol), Pd(OAc)<sub>2</sub> (22.4 mg, 0.1 mmol) and dppb (42.7 mg, 0.1 mmol) in DMSO (8.8 mL) was added DIEA (1.03 g, 1.4 mL, 8.0 mmol) under argon. The resulting mixture was stirred at 100 °C for 12 h. Then the mixture was cooled to room temperature, diluted with EtOAc (50 mL), washed with water (20 mL x 3), brine (20 mL), successively. The organic phase was dried over anhydrous Na<sub>2</sub>SO<sub>4</sub>, filtered, concentrated, and the crude residue was further purified by flash chromatography on silica gel (petroleum ether/ethyl acetate = 1:1, v/v) to afford the desired product **3** as a white solid (1.08 g, 90% yield).<sup>[2]</sup> <sup>1</sup>H NMR (400 MHz, CDCl<sub>3</sub>): δ 7.48–7.59 (m, 6H), 7.67–7.72 (m, 4H), 8.07 (d, 1H). <sup>13</sup>C NMR (100 MHz, CDCl<sub>3</sub>): δ: 129.0 (d, *J*<sub>C,P</sub> = 13.5 Hz), 130.8 (d, *J*<sub>C,P</sub> = 11.5 Hz), 131.5 (d, *J*<sub>C,P</sub> = 101.6 Hz), 132.7 (d, *J*<sub>C,P</sub> = 2.9 Hz). <sup>31</sup>P NMR (162 MHz, CDCl<sub>3</sub>): δ 21.5.

**(*S*)-2'-(diphenylphosphino)-[1,1'-binaphthalen]-2-yl trifluoromethanesulfonate**  
**(4)**

To a dried sealed tube charged with **3** (0.48 g, 0.81 mmol) in dry toluene (20 mL), Et<sub>3</sub>N (0.57 g, 0.79 mL, 5.67 mmol) and HSiCl<sub>3</sub> (0.54 g, 0.41 mL, 4.05 mmol)

were added successively under argon at 0 °C. The resulting mixture was stirring at 100 °C for 12 h. After cooled to 0 °C, diluted by Et<sub>2</sub>O (10 mL), quenched with several drops of saturated Na<sub>2</sub>CO<sub>3</sub>, the mixture was filtered by a short celite column, and washed with Et<sub>2</sub>O (10 mL x 3). The filtrate was dried over anhydrous Na<sub>2</sub>SO<sub>4</sub>, filtered, concentrated, and the residue was purified by flash chromatography on silica gel (petroleum ether/ethyl acetate = 20:1, v/v) to afford the desired product **4** as a white solid (0.394 g, 83% yield).<sup>[3]</sup> <sup>1</sup>H NMR (400 MHz, CDCl<sub>3</sub>) δ: 6.96-8.11 (m, 22H); <sup>31</sup>P NMR(162 MHz, CDCl<sub>3</sub>) δ: -13.3.

**(S)-(2'-(benzylamino)-[1,1'-binaphthalen]-2-yl)diphenylphosphine oxide (5)**

Phosphine **4** (150 mg, 0.20 mmol) was added to a solution of benzyl azide (33 mg, 0.24 mmol) in toluene/THF 1:1 (0.1 M). The reaction was stirred at 115 °C. After 17 h the reaction mixture was concentrated in vacuo yielding the phosphonium salt. The remaining phosphonium salt was stirred for 2 h at 65 °C in a mixture of THF (2 mL), EtOH (2 mL) and aqueous 0.1 M NaOH (2 mL). After cooling the mixture, Et<sub>2</sub>O was added and the organic phase was washed with H<sub>2</sub>O (25 mL) and brine (25 mL). The organic layer was dried (Na<sub>2</sub>SO<sub>4</sub>) and concentrated in vacuo. Purification by column chromatography (Et<sub>2</sub>O: pentane = 4:1→15:1) afforded **5** (0.11 g, 0.20 mmol, 99%) as a yellow foam. <sup>[4]</sup> <sup>1</sup>H NMR (400 MHz): δ 8.02 (d, *J* = 8.5 Hz, 1H), 7.96 (d, *J* = 8.0 Hz, 1H), 7.90 (dd, *J* = 9.0 Hz, 1H), 7.73 (d, *J* = 11.0 Hz, 1H), 7.72 (d, *J* = 11.5 Hz, 1H), 7.58 (t, *J* = 6.5 Hz, 1H), 7.42-7.50 (m, 3H), 7.25-7.36 (m, 10H), 7.22 (m, 1H), 7.03-7.08 (m, 2H), 6.97 (t, *J* = 6.5 Hz, 1H), 6.78-6.88 (m, 2H), 6.86 (d, *J* = 9.0 Hz, 1H), 6.60 (d, *J* = 8.5 Hz, 1H), 4.42 (s, 2H), 4.19 (br. s, 1H). <sup>13</sup>C NMR (100 MHz, nonaromatic only): δ 48.2. <sup>31</sup>P NMR (162 MHz): δ 28.4. IR (cm<sup>-1</sup>): 3342, 1624, 1526, 1468. HRMS: calcd for C<sub>39</sub>H<sub>31</sub>NOP [M+H]<sup>+</sup>: 560.2143, found: 560.2139.

**(S)-N-benzyl-2'-(diphenylphosphino)-[1,1'-binaphthalen]-2-amine (6)**

To a dried sealed tube charged with **5** (0.45 g, 0.81 mmol) in dry toluene (20 mL), Et<sub>3</sub>N (0.57 g, 0.79 mL, 5.67 mmol) and HSiCl<sub>3</sub> (0.55 g, 0.41 mL, 4.05 mmol) were added successively under argon at 0 °C. The resulting mixture was stirring at 100 °C for 12 h. After cooled to 0 °C, diluted by Et<sub>2</sub>O (10 mL), quenched with several drops of saturated Na<sub>2</sub>CO<sub>3</sub>, the mixture was filtered by a short celite column, and

washed with Et<sub>2</sub>O (10 mL x 3). The filtrate was dried over anhydrous Na<sub>2</sub>SO<sub>4</sub>, filtered, concentrated, and the residue was purified by flash chromatography on silica gel (petroleum ether/ethyl acetate = 20:1, v/v) to afford the desired product **6** as a yellow foam. (0.39 g, 83% yield). <sup>1</sup>H NMR (400 MHz, CDCl<sub>3</sub>) δ 7.90-7.88 (m, 2H), 7.82 (d, *J* = 8.9 Hz, 1H), 7.71 (d, *J* = 8.9 Hz, 1H), 7.65-7.53 (m, 2H), 7.51-7.49 (m, 2H), 7.47-7.03 (m, 17H), 7.00-6.97 (m, 1H), 6.62 (d, *J* = 8.4 Hz, 1H), 4.18 (dd, *J* = 6.1 Hz, 1H), 4.01 (dd, *J* = 5.8 Hz, 1H), 3.70 (br. s, 1H). <sup>31</sup>P NMR (162 MHz): δ -13.9.

**(11bR)-N-benzyl-N-((S)-2'-(diphenylphosphino)-[1,1'-binaphthalen]-2-yl)dinaphtho[2,1-d:1',2'-f][1,3,2]dioxaphosphepin-4-amine (Yanphos)**

To a solution of **6** (0.27 g, 0.5 mmol) in THF (5 mL) at -78°C was added dropwise *n*-BuLi (0.65 mmol, 0.26 mL of 2.5 M hexane solution). The reaction mixture was stirred for 4h to give a deep red solution, and **7** (262 mg, 0.75 mmol) in THF (5 mL) was added dropwise. After addition, the cooling bath was removed and the mixture was stirred at room temperature overnight. The volatiles were evaporated under reduced pressure. To the residue was added CH<sub>2</sub>Cl<sub>2</sub> (10 mL), and the mixture was filtered to remove the salt. The filtration was concentrated and subjected to chromatography on silica gel (eluted with hexane/EtOAc 10:1) to afford pure ligand (*S,R*)- Bn-Yanphos (145 mg) in 60% yield.<sup>[5]</sup> <sup>1</sup>H NMR (400 MHz, CDCl<sub>3</sub>) δ 8.17 (d, *J* = 8.5 Hz, 1 H), 8.15 (d, *J* = 8.0 Hz, 1 H), 7.97 (d, *J* = 8.0 Hz, 1 H), 7.92 (d, *J* = 8.0 Hz, 1 H), 7.74–7.60 (m, 5 H), 7.43–7.01 (m, 23 H), 6.87–6.83 (m, 2 H), 6.79–6.75 (m, 2 H), 6.45–6.42 (m, 1 H), 6.24 (d, *J* = 8.5 Hz, 1 H), 5.93 (d, *J* = 8.5 Hz, 1 H), 3.82 (d, *J* = 14.5 Hz, 1 H), 3.21 (d, *J* = 14.5 Hz, 1 H); <sup>13</sup>C NMR (100 MHz, CDCl<sub>3</sub>) δ 150.1, 150.0, 149.8, 142., 141.9, 138.7, 128.2, 127.9, 137.8, 135.6, 135.4, 133.9, 133.5, 133.4, 132.0, 131.8, 131.7, 131.6, 130.7, 130.5, 130.3, 129.8, 129.8, 128.8, 128.7, 128.6, 128.5, 128.4, 128.4, 128.3, 128.2, 128.1, 128.0, 127.9, 127.8, 127.7, 127.4, 127.2, 127.2, 127.0, 126.8, 126.7, 126.1, 126.0, 125.3, 124.8, 124.6, 122.7, 122.5, 122.1, 51.3 ppm; <sup>31</sup>P NMR (162 MHz, CDCl<sub>3</sub>) δ: 138.41 (d, *J* = 78.6 Hz), 11.86 ppm (d, *J* = 78.6 Hz).

### 3. Procedures for the preparation of substrates

General procedure 1 for the synthesis of styrenes *via* Wittig olefination of aldehydes

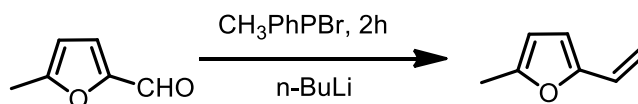

Synthesis of 2-methyl-5-vinylfuran (**8c**)

Methyl triphenyl phosphonium bromide (3.53 g, 9.894 mmol) was dissolved in dry THF (78.5 mL) under nitrogen atmosphere. At 23°C *n*-BuLi (3.95 mL, 9.894 mmol, 2.5 M in hexane) was added dropwise and the mixture was stirred for 15 min. Afterwards a solution of 5-methylfuran-2-carbaldehyde (1.03 g, 9.423 mmol) in dry THF (5 mL) was added. The reaction mixture was stirred at 23°C for 2 h, before it was quenched by addition of saturated aqueous ammonium chloride solution (50 mL) and extracted with methylene chloride (3x 30 mL). The combined organic layers were dried over sodium sulfate and the solvent was removed. The oily residue was purified by flash-chromatography through silica gel. 2-methyl-5-vinylfuran **8c** was obtained as a colorless oil (356 mg, 35%). The analytical data were in complete agreement with the previously published data.<sup>[6]</sup><sup>1</sup>H-NMR (400 MHz, CDCl<sub>3</sub>):  $\delta$  6.42 (dd, *J* = 17.5, 11.3 Hz, 1H), 6.12 (d, *J* = 3.2 Hz, 1H), 5.94 (ddd, *J* = 2.9 Hz, 1.9 Hz, 0.9 Hz, 1H), 5.56 (dd, *J* = 17.5 Hz, 1.3 Hz, 1H), 5.05 (dd, *J* = 11.3 Hz, 1.3 Hz, 1H), 2.29 (s, 3H).

Following the general procedure 1, **8d**, **8i** were obtained as a colorless oil.

General procedure 2 for the synthesis of 1-(Toluene-4-sulfonyl)-1H-pyrrole-2-carbaldehyde (**8a**)

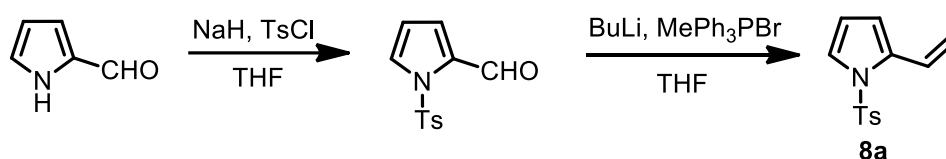

Synthesis of 1-(Toluene-4-sulfonyl)-1H-pyrrole-2-carbaldehyde

A solution of pyrrole-2-carbaldehyde (1.0 g, 11 mmol, 1 equiv.) in THF (10 mL)

was added over 10 min to a suspension of NaH (0.30 g, 13 mmol, 1.2 equiv.) in THF (60 mL) at 23 °C under argon. After 1 h, tosyl chloride (2.2 g, 12 mmol, 1.1 equiv.) was added. After stirring for 13 h at 23 °C, the reaction mixture was quenched with sat. NH<sub>4</sub>Cl (10 mL), diluted with water (200 mL) and extracted with Et<sub>2</sub>O (3x100 mL). The combined organic layer were washed with brine (50 mL), dried over Na<sub>2</sub>SO<sub>4</sub> and the solvent was removed under reduced pressure. The crude product was purified by column chromatography (AcOEt/hexane 1:10) to give desired product (2.5 g, 9.9 mmol, 94%) as a colorless solid. <sup>1</sup>H NMR (CDCl<sub>3</sub>, 400 MHz) δ/ppm 9.96 (s, 1H, aldehyde H), 7.79 (d, *J* = 8.4 Hz, 2H, phenyl H), 7.61 (m, 1H, pyrrole H), 7.31 (d, *J* = 8.1 Hz, 2H, phenyl H), 7.14 (m, 1H, pyrrole H), 6.40 (m, 1H, pyrrole H), 2.40 (s, 3H, CH<sub>3</sub>).

#### Synthesis of 1-(Toluene-4-sulfonyl)-2-vinyl-1H-pyrrole (**8a**)

*n*-BuLi (1.6M in hexane, 5.5 mL, 8.8 mmol, 1.1 equiv.) was added to a suspension of methyltriphenylphosphonium bromide (3.4 g, 9.5 mmol, 1.2 equiv.) in THF (70 mL) at 0 °C under argon. After stirring for 2 h, the reaction mixture was cooled to -78 °C and a solution of 1-(Toluene-4-sulfonyl)-1H-pyrrole-2-carbaldehyde (2.0 g, 8.0 mmol, 1.0 equiv.) in THF (10 mL) was added dropwise. The reaction was warm up to 23°C over 12 h, quenched with water (150 mL) and extracted with Et<sub>2</sub>O (3x100 mL). The combined organic layer were washed with water (50 mL) and brine (50 mL), dried over Na<sub>2</sub>SO<sub>4</sub> and the solvent was removed under reduced pressure. The crude product was purified by column chromatography (AcOEt/hexane 1:15) to give **8a** (1.8 g, 7.3 mmol, 91%) as a colorless solid. <sup>1</sup>H NMR (CDCl<sub>3</sub>, 400 MHz): δ 7.69 (d, *J* = 8.4 Hz, 2H, phenyl H), 7.31-7.28 (m, 1H, pyrrole H), 7.27 (d, *J* = 8.1 Hz, 2H, phenyl H), 7.10 (dd, *J* = 17.4 Hz, 11.2 Hz, 1H, vinyl H), 6.44 (m, 1H, pyrrole H), 6.24 (m, 1H, pyrrole H), 5.48 (dd, *J* = 17.4 Hz, 1.2 Hz, 1H, vinyl H), 5.15 (dd, *J* = 11.2 Hz, 1.5 Hz, 1H, vinyl H), 2.39 (s, 3H, CH<sub>3</sub>);

General procedure 3 for the synthesis of 2-Vinyl-pyrrole-1-carboxylic acid *tert*-butyl ester (**8b**)

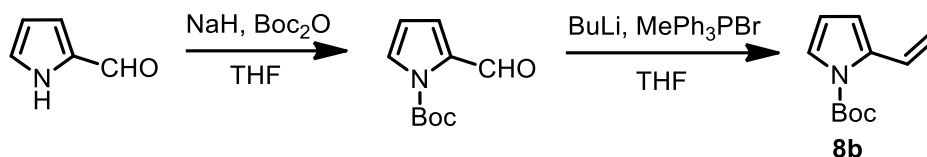

### 2-Formyl-pyrrole-1-carboxylic acid tert-butyl ester

A solution of pyrrole-2-carbaldehyde (1.0 g, 11 mmol, 1.0 equiv) in THF (10 mL) was added over 10 min to a suspension of NaH (0.30 g, 13 mmol, 1.2 equiv.) in THF (60 mL) at 23 °C under argon. After 1 h, Boc anhydride (2.5 g, 12 mmol, 1.1 equiv) was added. After stirring for 13 h at 23 °C, the reaction mixture was quenched with sat. NH<sub>4</sub>Cl (10 mL), diluted with water (200 mL) and extracted with Et<sub>2</sub>O (3x100 mL). The combined organic layer were washed with brine (50 mL), dried over Na<sub>2</sub>SO<sub>4</sub> and the solvent was removed under reduced pressure. The crude product was purified by column chromatography (AcOEt/hexane 1:30) to give 2-Formyl-pyrrole-1-carboxylic acid *tert*-butyl ester (2.0 g, 10 mmol, 97%) as an oil. <sup>1</sup>H NMR (CDCl<sub>3</sub>, 400 MHz): δ 10.29 (s, 1H, aldehyde H), 7.41 (m, 1H, pyrrole H), 7.14 (m, 1H, pyrrole H), 6.24 (m, 1H, pyrrole H), 1.61 (s, 9H, CH<sub>3</sub>).

### 2-Vinyl-pyrrole-1-carboxylic acid tert-butyl ester (**8b**)

*n*-BuLi (1.6M in hexane, 5.5 mL, 8.8 mmol, 1.1 equiv.) was added to a suspension of methyltriphenylphosphonium bromide (3.4 g, 9.5 mmol, 1.2 equiv.) in THF (70 mL) at 0 °C under argon. After stirring for 2 h, the reaction mixture was cooled to -78 °C and a solution of **91** (1.6 g, 8.0 mmol, 1.0 equiv) in THF (10 mL) was added dropwise. The reaction was warm up to 23 °C over 12 h, quenched with water (150 mL) and extracted with Et<sub>2</sub>O (3x100 mL). The combined organic layer were washed with water (50 mL) and brine (50 mL), dried over Na<sub>2</sub>SO<sub>4</sub> and the solvent was removed under reduced pressure. The crude product was purified by column chromatography (AcOEt/hexane 1:30) to give **8b** (1.22 g, 6.33 mmol, 79%) as a yellow oil. <sup>1</sup>H NMR (CDCl<sub>3</sub>, 400 MHz): δ 7.25 (m, 1H, pyrrole H), 7.23 (dd, *J* = 17.4 Hz, 11.2 Hz, 1H, vinyl H), 6.43 (m, 1H, pyrrole H), 6.14 (m, 1H, pyrrole H), 5.53 (dd, *J* = 17.4 Hz, 1.6 Hz, 1H, vinyl H), 5.12 (dd, *J* = 11.2 Hz, 1.6 Hz, 1H, vinyl H), 1.61 (s, 9H, CH<sub>3</sub>).

Following the general procedure 2, **8e** was obtained as a colorless oil (1.04 g,



3.5 mmol, 85%). <sup>1</sup>H NMR (CDCl<sub>3</sub>, 400 MHz) δ 7.94 (d, 2H), 7.74 (d, *J* = 8.7 Hz, 2H, phenyl H), 7.40 (d, 2H), 7.33 (dd, 1H, indole H), 6.87 (dd, 1H), 6.66 (1H, indole H), 6.63 (dd, 1H, vinyl H), 5.80 (d, *J* = 17.7 Hz, 1H, vinyl H), 5.35 (d, *J* = 11.2 Hz, 1H, vinyl H), 2.31 (s, 3H, CH<sub>3</sub>) and **8g** was obtained as a colorless oil (0.98 g, 3.3 mmol, 85%). <sup>1</sup>H NMR (CDCl<sub>3</sub>, 400 MHz) δ 8.01 (m, *J* = 8.1 Hz, 1H, indole H), 7.82-7.73 (m, 1H, indole H), 7.78 (d, *J* = 8.7 Hz, 2H, phenyl H), 7.62 (s, 1H, indole H), 7.37-7.24 (m, 2H, indole H), 7.20 (d, *J* = 7.8 Hz, 2H, phenyl H), 6.77 (m, *J* = 17.7, 11.2 Hz, 1H, vinyl H), 5.80 (m, *J* = 18.0 Hz, 1H, vinyl H), 5.35 (m, *J* = 11.2 Hz, 1H, vinyl H), 2.31 (s, 3H, CH<sub>3</sub>).

Following the general procedure 3, **8f** was obtained as a yellow oil (0.84g, 3.5 mmol, 80%). <sup>1</sup>H NMR (CDCl<sub>3</sub>, 400 MHz): δ 8.11 (d, *J* = 7.9 Hz, 1H, indole H), 7.93 (d, *J* = 7.6 Hz, 1H, indole H), 7.33 (s, 1H, indole H), 6.87 (1H, indole H), 6.66 (1H, indole H), 6.63 (vinyl H), 5.84 (d, *J* = 17.8 Hz, 1H, vinyl H), 5.35 (d, *J* = 11.3 Hz, 1H, vinyl H), 1.70 (s, 9H, CH<sub>3</sub>); and **8h** was obtained as a yellow oil (0.72 g, 3.0 mmol, 80%). <sup>1</sup>H NMR (CDCl<sub>3</sub>, 400 MHz) δ: 8.21 (d, *J* = 7.9 Hz, 1H, indole H), 7.81 (d, *J* = 7.6 Hz, 1H, indole H), 7.65 (s, 1H, indole H), 7.39-7.25 (m, 2H, indole H), 6.83 (dd, *J* = 17.8 Hz, 11.3 Hz, 1H, vinyl H), 5.84 (d, *J* = 17.8 Hz, 1H, vinyl H), 5.35 (d, *J* = 11.3 Hz, 1H, vinyl H), 1.70 (s, 9H, CH<sub>3</sub>).

### Synthesis of N-vinylindole (**8j**)

N-vinylindole was obtained by the N-alkylation of indole. Under the nitrogen atmosphere, indole (5.0 g, 38 mmol) was added to an intensely stirred mixture of 1,2-dichloroethane (100 g, 1.0 mol), tetrabutylammonium bromide (0.25 g, 0.8 mmol), KOH (14 g, 250 mmol), and K<sub>2</sub>CO<sub>3</sub> (11 g, 80 mmol) at room temperature. The stirring was continued at 50 °C for 72 h. After cooling, the inorganic material was filtered off, and the organic solvent was removed by evaporation. A mixture of the condensate, which corresponds to crude 3-chloroethylindole (5.0 g, 26 mmol), KOH (2.2 g, 240 mmol), and hydroquinone (30 mg, 0.27 mmol), was placed in toluene (100 mL) and refluxed for 3 h. After the toluene solution was evaporated under reduced pressure, the organic material was extracted from the reaction mixture by means of methylene

chloride (30 mL) with water (50 mL). The extract was then dried over anhydrous MgSO<sub>4</sub> and filtered, and the solvent was evaporated to give a dark red liquid. The crude product was purification by silica gel chromatography eluted with n-hexane/ethyl acetate 5/1 (volume ratio) to give N-vinylindole as a pale yellow liquid (2.8 g, yield 73%).

#### Synthesis of allyl-1H-indole (**8k**)

Allyl-1H-indole (**8k**): A mixture of indole (0.59 g, 5.0 mmol), allyl chloride (0.38 g, 5.0 mmol), NaOH (0.40 g, 10.0 mmol) in DMSO (10 mL) was vigorously stirred at room temperature under nitrogen atmosphere for 2.5 h. The reaction mixture was diluted with EtOAc (40 mL) and washed with H<sub>2</sub>O (2×30 mL). The aqueous phase was extracted with EtOAc (2×30 mL), and the combined organic phase was dried over Na<sub>2</sub>SO<sub>4</sub>. After filtration and evaporation of the solvents in vacuo, the crude product was purified by column chromatography on silica gel (petroleum ether/EtOAc= 30/1) to give **8k** (0.78 g, 99%) as a brown oil. <sup>1</sup>H-NMR (400 MHz, CDCl<sub>3</sub>): δ 7.67 (dd, *J* = 8.0 Hz, 4.0 Hz, 1H), 7.35 (dd, *J* = 8.0 Hz, 3.0 Hz, 1H), 7.25-7.22 (m, 1H), 7.16-7.12 (m, 2H), 6.55 (s, 1H), 6.06-5.98 (m, 1H), 5.24-5.21 (m, 1H), 5.13-5.09 (m, 1H), 4.76-4.75 (m, 2H).

#### 4. General procedure for asymmetric hydroformylation

In a glovebox filled with nitrogen, to a 5 ml vial equipped with a magnetic bar was added ligand (*S,R*)- Bn-Yanphos (0.005 mmol) and Rh(acac)(CO)<sub>2</sub> (0.0025 mmol in 0.20 mL solvent). After stirring for 10 min, substrate (0.5 mmol) and additional solvent was charged to bring the total volume of the reaction mixture to 1.0 mL. The vial was transferred into an autoclave and taken out of the glovebox. Carbon monoxide (10 bar) and hydrogen (10 bar) were charged in sequence. The reaction mixture was stirred at 70 °C (oil bath) for 24 h. The reaction was cooled and the pressure was carefully released in a well-ventilated hood. The conversion and b/l were

determined by  $^1\text{H}$  NMR spectroscopy from the crude reaction mixture. The enantiomeric excesses of **9a-9k** were determined by HPLC.

## 5. General procedure for reduction of aldehydes

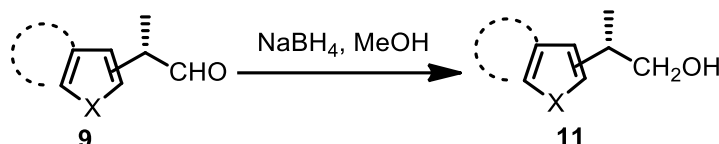

The crude mixture of **9** was treated with  $\text{NaBH}_4$  (40 mg) in MeOH (2 mL) at  $0^\circ\text{C}$ . After stirring at  $0^\circ\text{C}$  for 2h, the reaction mixture was quenched with saturated aqueous  $\text{H}_2\text{O}$  (5 mL) and extracted 2 times with ethyl acetate (5 mL). The combined organic layers were washed with brine and dried over  $\text{Na}_2\text{SO}_4$ , the solvents were removed under reduced pressure, and the residue was purified by flash chromatography on silica gel (petroleum ether/ethyl acetate = 10:1, v/v) to afford the desired alcohols **11**.

## 6. Characterizations of compounds

### (*S*)-2-(1-tosyl-1*H*-pyrrol-2-yl)propan-1-ol (**11a**)

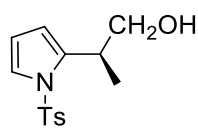

White solid, 114 mg, 82% yield; 94% *ee*;  $[\alpha]_{25\text{D}} = 14.3$  ( $c = 0.3$ ,  $\text{CHCl}_3$ ).  $^1\text{H}$  NMR (400 MHz,  $\text{CDCl}_3$ )  $\delta$  7.66 (d, 2H), 7.33 (d, 2H), 6.29 (s, 1H), 6.15 (s, 1H), 3.67-3.63 (m, 1H), 3.59-3.55 (m, 1H), 3.49-3.40 (m, 1H) 2.43 (s, 3H), 1.15 (d, 3H). Enantiomeric excess was determined by HPLC analysis: Daicel Chiralcel AD-H, hexane/*i*-PrOH = 95:5, flow rate = 1.0 mL/min,  $\lambda = 220$  nm,  $t_{\text{major}} = 32.2$  min,  $t_{\text{minor}} = 40.2$  min;

### (*S*)-*tert*-butyl 2-(1-hydroxypropan-2-yl)-1*H*-pyrrole-1-carboxylate (**11b**)

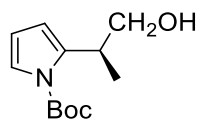

White solid, 90 mg, 80% yield, 91% *ee*,  $[\alpha]_D^{25} = 3.3$  (*c* = 0.3, CHCl<sub>3</sub>). <sup>1</sup>H NMR (400 MHz, CDCl<sub>3</sub>)  $\delta$  7.24 (q, 1H), 6.16-6.11 (m, 2H), 3.82-3.67(m, 3H), 1.62 (s, 9H), 1.31 (d, 3H); <sup>13</sup>C NMR (100 MHz, CDCl<sub>3</sub>)  $\delta$ : 149.7, 137.8, 121.6, 110.2, 110.1, 83.7, 67.7, 34.7, 28.0, 17.2. Enantiomeric excess was determined by HPLC analysis: Daicel Chiralcel AD-H, hexane/*i*-PrOH = 90:10, flow rate = 1.0 mL/min,  $\lambda$  = 220 nm,  $t_{\text{major}} = 5.1$  min,  $t_{\text{minor}} = 5.5$  min; HRMS calculated  $[M+H]^+$  for C<sub>12</sub>H<sub>20</sub>NO<sub>3</sub>: 226.1437, found: 226.1435.

**(R)-2-(5-methylfuran-2-yl)propan-1-ol (11c)**

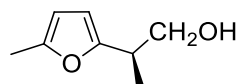

White solid, 54 mg, 78% yield, 94% *ee*,  $[\alpha]_D^{25} = -3.3$  (*c* = 0.3, CHCl<sub>3</sub>). <sup>1</sup>H NMR (400 MHz, CDCl<sub>3</sub>)  $\delta$  5.99 (s, 1H), 5.91 (s, 1H), 3.74 (d, 2H), 3.06-2.97 (m, 1H), 2.29 (s, 3H), 1.28 (d, 3H). Enantiomeric excess was determined by HPLC analysis: Daicel Chiralcel AS-H, hexane/*i*-PrOH = 95:5, flow rate = 1.0 mL/min,  $\lambda$  = 220 nm,  $t_{\text{major}} = 7.2$  min,  $t_{\text{minor}} = 7.6$  min.

**(R)-2-(3-methylthiophen-2-yl)propan-1-ol (11d)**

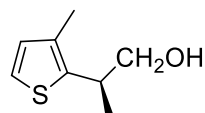

I White solid, 64 mg, 82% yield, 94% *ee*,  $[\alpha]_D^{25} = -3.3$  (*c* = 0.3, CHCl<sub>3</sub>). <sup>1</sup>H NMR (400 MHz, CDCl<sub>3</sub>)  $\delta$  7.15 (d, 1H), 6.85 (d, 1H), 3.72-3.65 (m, 2H), 3.41-3.33 (m, 1H), 2.24 (s, 3H), 1.34 (d, 3H); <sup>13</sup>C NMR (100 MHz, CDCl<sub>3</sub>)  $\delta$ : 140.6, 133.6, 130.1, 121.9, 68.9, 36.1, 18.9, 13.8. Enantiomeric excess was determined by HPLC analysis: Daicel Chiralcel AS-H, hexane/*i*-PrOH = 95:5, flow rate = 1.0 mL/min,  $\lambda$  = 220 nm,  $t_{\text{major}} = 7.2$  min,  $t_{\text{minor}} = 8.2$  min. HRMS calculated  $[M+H]^+$  for C<sub>9</sub>H<sub>13</sub>OS: 157.0681, found: 157.0680.

**(S)-2-(1-tosyl-1H-indol-2-yl)propan-1-ol (11e)**

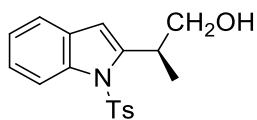

White solid, 130 mg, 79% yield, 95% *ee*,  $[\alpha]_{\text{D}}^{25} = -98.7$  ( $c = 0.3$ ,  $\text{CHCl}_3$ ).  $^1\text{H}$  NMR (400 MHz,  $\text{CDCl}_3$ )  $\delta$  8.23 (d, 1H), 7.63 (d, 2H), 7.47 (d, 1H), 7.33-7.19 (m, 4H), 6.55 (s, 1H), 3.92-3.84 (m, 2H), 3.81-3.77 (q, 1H), 2.35 (s, 3H), 1.39 (d, 3H);  $^{13}\text{C}$  NMR (100 MHz,  $\text{CDCl}_3$ )  $\delta$ : 144.8, 144.1, 137.4, 135.8, 129.8, 129.7, 126.1, 124.3, 123.7, 120.3, 115.3, 108.8, 67.7, 35.5, 21.6, 17.5. Enantiomeric excess was determined by HPLC analysis: Daicel Chiralcel AD-H, hexane/*i*-PrOH = 80:20, flow rate = 1.0 mL/min,  $\lambda = 220$  nm,  $t_{\text{major}} = 13.8$  min,  $t_{\text{minor}} = 29.3$  min; HRMS calculated  $[\text{M}+\text{H}]^+$  for  $\text{C}_{18}\text{H}_{20}\text{NO}_3\text{S}$ : 330.1158, found: 330.1152.

**(S)-tert-butyl 2-(1-hydroxypropan-2-yl)-1H-indole-1-carboxylate (11f)**

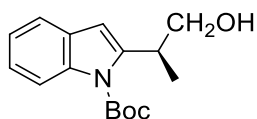

White solid, 110 mg, 80% yield, 95% *ee*,  $[\alpha]_{\text{D}}^{25} = 1.0$  ( $c = 0.3$ ,  $\text{CHCl}_3$ ).  $^1\text{H}$  NMR (400 MHz,  $\text{CDCl}_3$ )  $\delta$  8.06 (d, 1H), 7.52 (d, 1H), 7.28-7.21 (m, 2H), 6.53 (s, 1H), 4.01-3.84 (m, 2H), 3.82 (q, 1H), 1.73 (s, 9H), 1.41 (d, 3H). Enantiomeric excess was determined by HPLC analysis: Daicel Chiralcel IB-H, hexane/*i*-PrOH = 95:5, flow rate = 1.0 mL/min,  $\lambda = 220$  nm,  $t_{\text{minor}} = 6.9$  min,  $t_{\text{major}} = 7.3$  min.

**(S)-2-(1-tosyl-1H-indol-3-yl)propan-1-ol (11g)**

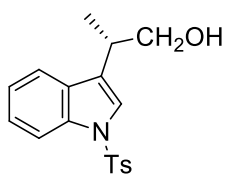

White solid, 123 mg, 75% yield, 93% *ee*,  $[\alpha]_{\text{D}}^{25} = 14.7$  ( $c = 0.3$ ,  $\text{CHCl}_3$ ).  $^1\text{H}$  NMR (400 MHz,  $\text{CDCl}_3$ )  $\delta$  8.03 (d, 1H), 7.80 (d, 2H), 7.58 (d, 1H), 7.43 (s, 1H), 7.37 (t, 1H), 7.25 (m, 3H), 3.83-3.76 (m, 2H), 3.18-3.26 (m, 1H), 2.35 (s, 3H), 1.41 (d, 3H);  $^{13}\text{C}$  NMR (100 MHz,  $\text{CDCl}_3$ )  $\delta$ : 144.9, 135.4, 135.1, 130.3, 129.8, 126.8, 124.9, 124.8, 123.1, 122.7, 119.7, 113.8, 67.2, 33.5, 21.6, 16.7. Enantiomeric excess was determined by HPLC analysis: Daicel Chiralcel IB -H, hexane/*i*-PrOH = 95:5, flow rate = 1.0 mL/min,  $\lambda = 220$  nm,  $t_{\text{major}} = 22.7$  min,  $t_{\text{minor}} = 25.3$  min; HRMS calculated  $[\text{M}+\text{H}]^+$  for  $\text{C}_{18}\text{H}_{20}\text{NO}_3\text{S}$ : 330.1158, found: 330.1152.

**(S)-tert-butyl 3-(1-hydroxypropan-2-yl)-1H-indole-1-carboxylate (11h)**

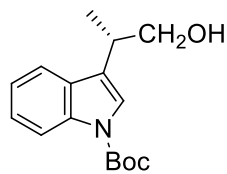

White solid, 105 mg, 76% yield, 96% *ee*,  $[\alpha]_{\text{D}}^{25} = 1.0$  ( $c = 0.3$ ,  $\text{CHCl}_3$ ).  $^1\text{H}$  NMR (400 MHz,  $\text{CDCl}_3$ )  $\delta$  8.16 (s, 1H), 7.63 (d, 1H), 7.47 (s, 1H), 7.38-7.34 (t, 1H), 7.27-7.25 (m, 1H), 3.91-3.79 (m, 2H), 3.28 (m, 1H), 1.71 (s, 9H), 1.43 (d, 3H);  $^{13}\text{C}$  NMR (100 MHz,  $\text{CDCl}_3$ )  $\delta$ : 149.7, 136.6, 129.9, 124.6, 124.5, 122.6, 122.4, 119.2, 115.4, 83.6, 67.3, 33.5, 28.2, 16.8. Enantiomeric excess was determined by HPLC analysis: Daicel Chiralcel IB-H, hexane/*i*-PrOH = 95:5, flow rate = 1.0 mL/min,  $\lambda = 220$  nm,  $t_{\text{major}} = 7.4$  min,  $t_{\text{minor}} = 8.2$  min; HRMS calculated  $[\text{M}+\text{H}]^+$  for  $\text{C}_{16}\text{H}_{22}\text{NO}_3$ :267.1594, found: 267.1591.

**(R)-2-(benzo[*b*]thiophen-2-yl)propan-1-ol (11i)**

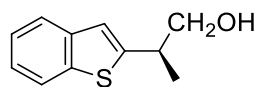

White solid, 78 mg, 82% yield, 92% *ee*.  $[\alpha]_{\text{D}}^{25} = -4.0$  ( $c = 0.3$ ,  $\text{CHCl}_3$ ).  $^1\text{H}$  NMR (400 MHz,  $\text{CDCl}_3$ )  $\delta$  7.84 (d, 1H), 7.75 (d, 1H), 7.38-7.32 (m, 2H), 7.16 (s, 1H), 3.82 (m, 2H), 3.37 (m, 1H), 1.46 (d, 3H). Enantiomeric excess was determined by HPLC analysis: Daicel Chiralcel AS-H, hexane/*i*-PrOH = 95:5, flow rate = 1.0 mL/min,  $\lambda = 220$  nm,  $t_{\text{minor}} = 11.5$  min,  $t_{\text{major}} = 12.4$  min.

**(R)-2-(1H-indol-1-yl)propan-1-ol (11j)**

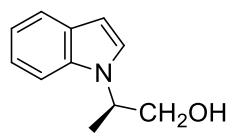

White solid, 76 mg, 87% yield, 95% *ee*,  $[\alpha]_{\text{D}}^{25} = 47.0$  ( $c = 0.3$ ,  $\text{CHCl}_3$ ).  $^1\text{H}$  NMR (400 MHz,  $\text{CDCl}_3$ )  $\delta$ : 7.69 (d, 1H), 7.46 (d, 1H), 7.27-7.23 (m, 2H), 7.17 (t, 1H), 6.60 (d, 1H), 4.74 (m, 1H), 3.92 (t, 2H), 1.60 (d, 3H);  $^{13}\text{C}$  NMR (100 MHz,  $\text{CDCl}_3$ )  $\delta$ : 136.1, 128.5, 124.2, 121.6, 121.6, 121.1, 119.6, 109.5, 102.1, 66.5, 53.1, 16.9. Enantiomeric excess was determined by HPLC analysis: Daicel Chiralcel AS-H, hexane/*i*-PrOH = 95:5, flow rate = 1.0 mL/min,  $\lambda = 220$  nm,  $t_{\text{major}} = 13.0$  min,

$t_{\text{minor}} = 15.3$  min; HRMS calculated  $[M+H]^+$  for  $C_{11}H_{14}NO$ :176.1069, found: 176.1067.

### (S)-3-(1*H*-indol-1-yl)-2-methylpropan-1-ol (11k)

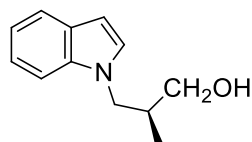

White solid, 63 mg, 67% yield, 90% *ee*,  $[\alpha]_D^{25} = 2.0$  ( $c = 0.3$ ,  $CHCl_3$ ).  $^1H$  NMR (400 MHz,  $CDCl_3$ )  $\delta$  7.68 (d, 1H), 7.43 (d, 1H), 7.26 (t, 1H), 7.15-7.11 (m, 2H), 6.54 (d, 1H), 4.31 (q, 1H), 4.06 (q, 1H), 3.54 (d, 2H), 2.34 (m, 1H), 1.01 (d, 3H);  $^{13}C$  NMR (100 MHz,  $CDCl_3$ )  $\delta$ : 136.2, 128.6, 128.4, 121.4, 120.9, 119.2, 109.5, 101.1, 65.0, 48.9, 36.7, 14.9. Enantiomeric excess was determined by HPLC analysis: Daicel Chiralcel OD-H, hexane/*i*-PrOH = 95:5, flow rate = 1.0 mL/min,  $\lambda = 220$  nm,  $t_{\text{minor}} = 26.6$  min,  $t_{\text{major}} = 32.9$  min; HRMS calculated  $[M+H]^+$  for  $C_{12}H_{16}NO$ :190.1226, found: 190.1223.

## 7. Procedures for the preparation of (S)- $\alpha$ -Methyl-3-indolylacetic acid

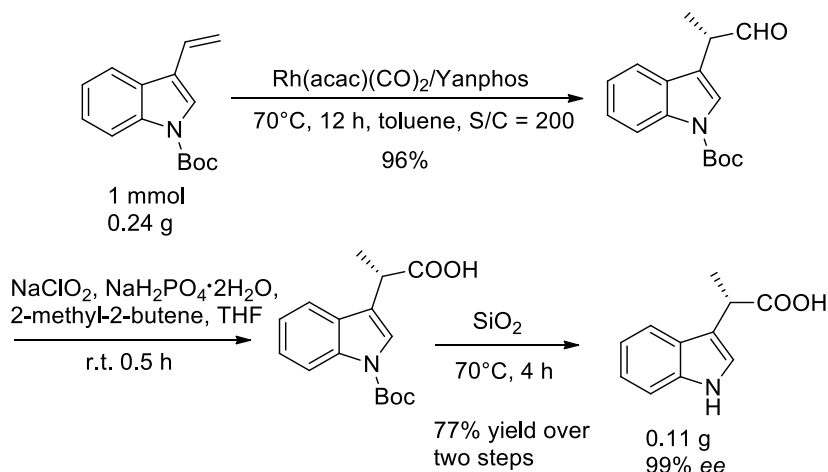

In a glovebox filled with nitrogen, to a 5 ml vial equipped with a magnetic bar was added ligand (*S,R*)- Bn-Yanphos (0.01 mmol in 1 mL solvent) and  $Rh(acac)(CO)_2$  (0.005 mmol in 0.25 mL solvent) After stirring for 10 min, substrate **8h** (1 mmol) and additional solvent was charged to bring the total volume of the reaction mixture to 2 mL. The vial was transferred into an autoclave and taken out of the glovebox. Carbon

monoxide (10 bar) and hydrogen (10 bar) were charged in sequence. The reaction mixture was stirred at 70 °C (oil bath) for 12 h. The reaction was cooled and the pressure was carefully released in a well-ventilated hood. The reaction mixture was transferred into a 20 mL Schlenk tube, then *t*-BuOH (10 mL), 2-methyl-2-butene (2.0 M in THF, 5.5 mL, 11 mmol), and NaH<sub>2</sub>PO<sub>4</sub> (276 mg, 1.77 mmol) in H<sub>2</sub>O (2.0 mL) were added. The mixture was cooled to 0°C, then NaOClO (994 mg, 11.0 mmol) in 2 mL of H<sub>2</sub>O was added. After being stirred for 30 min at room temperature. The reaction mixture was poured into saturated aq NH<sub>4</sub>Cl (5 mL), and whole was extracted with EtOAc (5 mL). The combined organic layers were washed with brine (5 mL) and dried over anhydrous Na<sub>2</sub>SO<sub>4</sub>. Filtration and evaporation in vacuo furnished the crude product, the crude product was used directly in next step.

The crude product was transferred into a 50 mL bottom flask, then EtOAc (10 mL), silica gel (300 mg) were added, evaporation in vacuo, then the reaction mixture was stirred at 70 °C in vacuo (oil bath) for 4 h. The crude product was purified by column chromatography (silica gel, 1:1 hexane/EtOAc) to provide **12** (0.11 g, 77%) as a dark yellow oil: {[ $\alpha$ ]<sup>25</sup><sub>D</sub> = +37.0 (c = 0.1, CHCl<sub>3</sub>) for 99% ee} was the same as that reported in the literature {lit.7 [ $\alpha$ ]<sup>25</sup><sub>D</sub> = +41.5 (c = 0.13, CH<sub>2</sub>Cl<sub>2</sub>) for >99% ee}. <sup>1</sup>H NMR (400 MHz, CDCl<sub>3</sub>) : 1.63 (d, *J* = 7.3 Hz, 3H, CH<sub>3</sub>CHAr), 4.05 (q, *J* = 7.3 Hz, 1H, CH<sub>3</sub>CHAr), 7.13 (dd, *J* = 7.3 Hz, 8.0 Hz, 1H, Ar), 7.15 (s, 1H, Ar), 7.20 (dd, *J* = 7.3 Hz, 7.3 Hz, 1H, Ar), 7.36 (d, *J* = 8.0 Hz, 1H, Ar), 7.69 (d, *J* = 7.6 Hz, 1H, Ar), 8.07 (br s, 1H, NH). Enantiomeric excess was determined by HPLC analysis: Daicel Chiralcel IC, hexane/*i*-PrOH = 90:10, flow rate = 0.5 mL/min,  $\lambda$  = 220 nm, 40°C, *t*<sub>major</sub> = 18.3 min, *t*<sub>minor</sub> = 26.7 min



## 8. References

- [1] T. Ooi, M. Kameda, K. Maruoka, *J. Am. Chem. Soc.* 2003, **125**, 5139.
- [2] Y. Uozumi, A. Tanahashi, S.Y. Lee, T. Hayashi, *J. Org. Chem.* 1993, **58**, 1945.
- [3] Y. Uozumi, A. Tanahashi, S.Y. Lee, T. Hayashi, *J. Org. Chem.* 1993, **58**, 1945.
- [4] P. N. M. Botman, O. David, A. Amore, J. Dinkelaar, M. T. Vlaar, K. Goubitz, J. Fraanje, H. Schenk, H. Hiemstra, J. H. van Maarseveen, *Angew. Chem. Int. Ed.* 2004, **43**, 3471–3473.
- [5] Y. Yan, X. Zhang, *J. Am. Chem. Soc.* 2006, **128**, 7198-7202.
- [6] T. Mitsudome, A. Noujima, Y. Mikami, T. Mizugaki, K. Jitsukawa, K. Kaneda, *Chem. Eur. J.* 2010, **16**, 11818.
- [7] M. Richter, W. Whitefield, J. Maimone, W. Lin, P. Castroviejo, S. Baran, *J. Am. Chem. Soc.* 2007, **129**, 12857–12869.

## 9. NMR spectra of compound

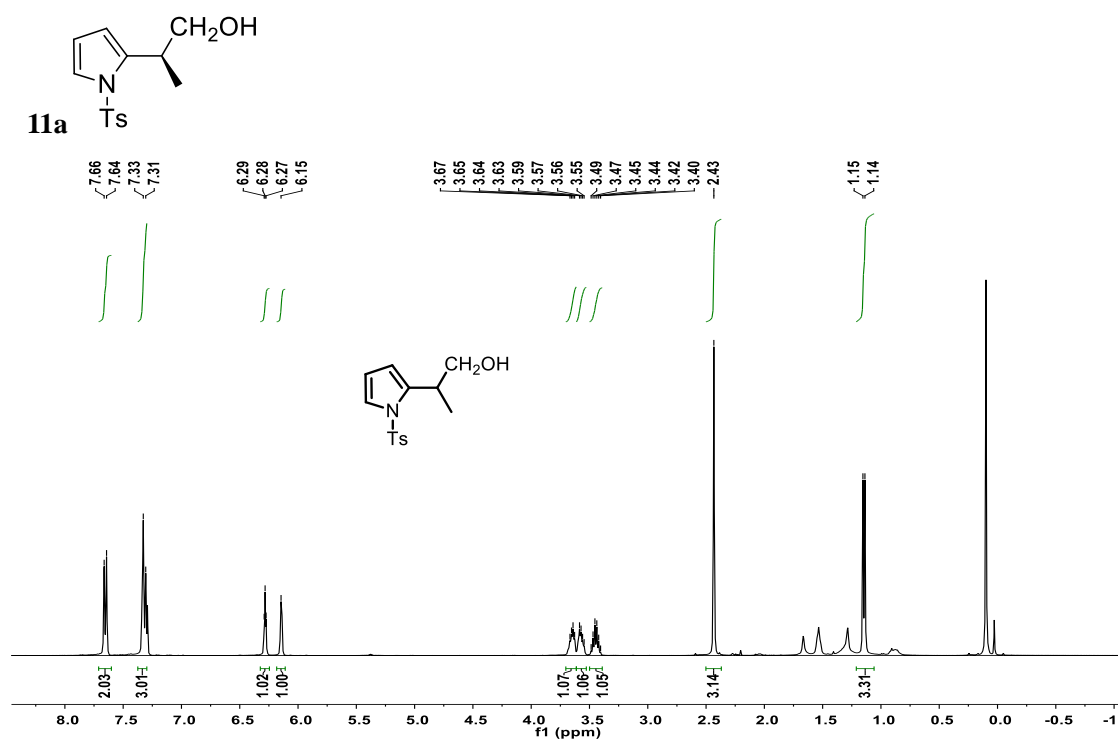

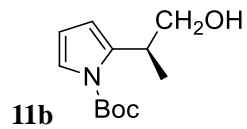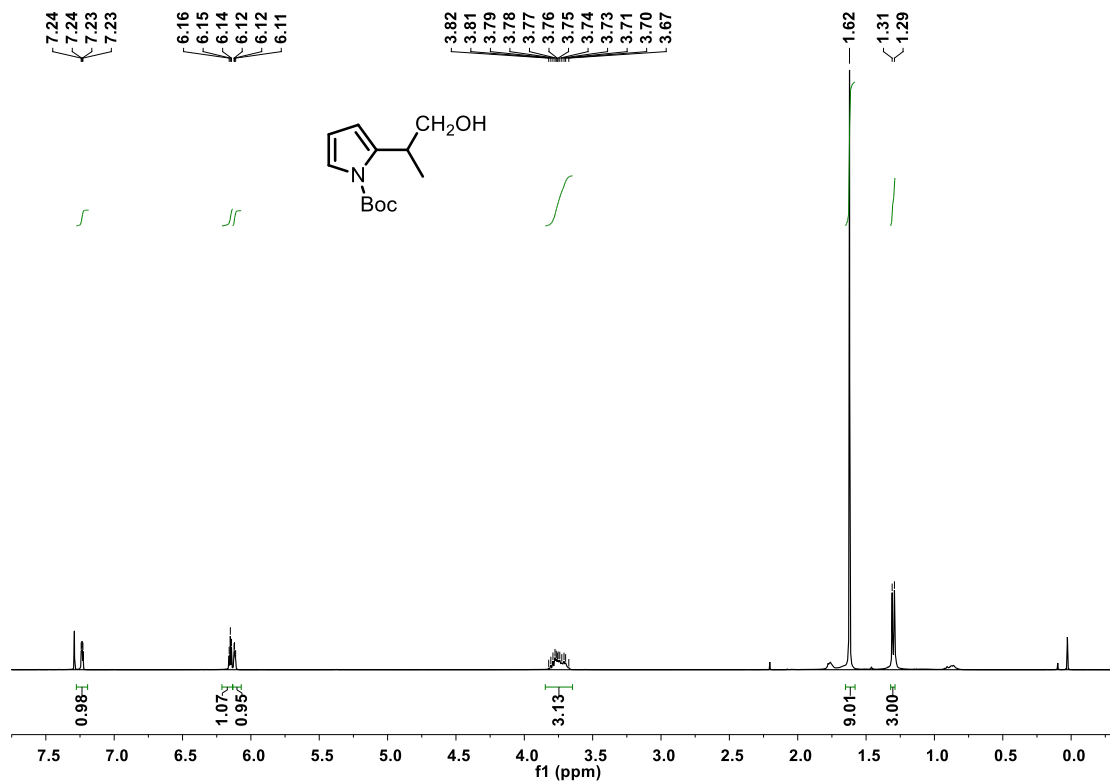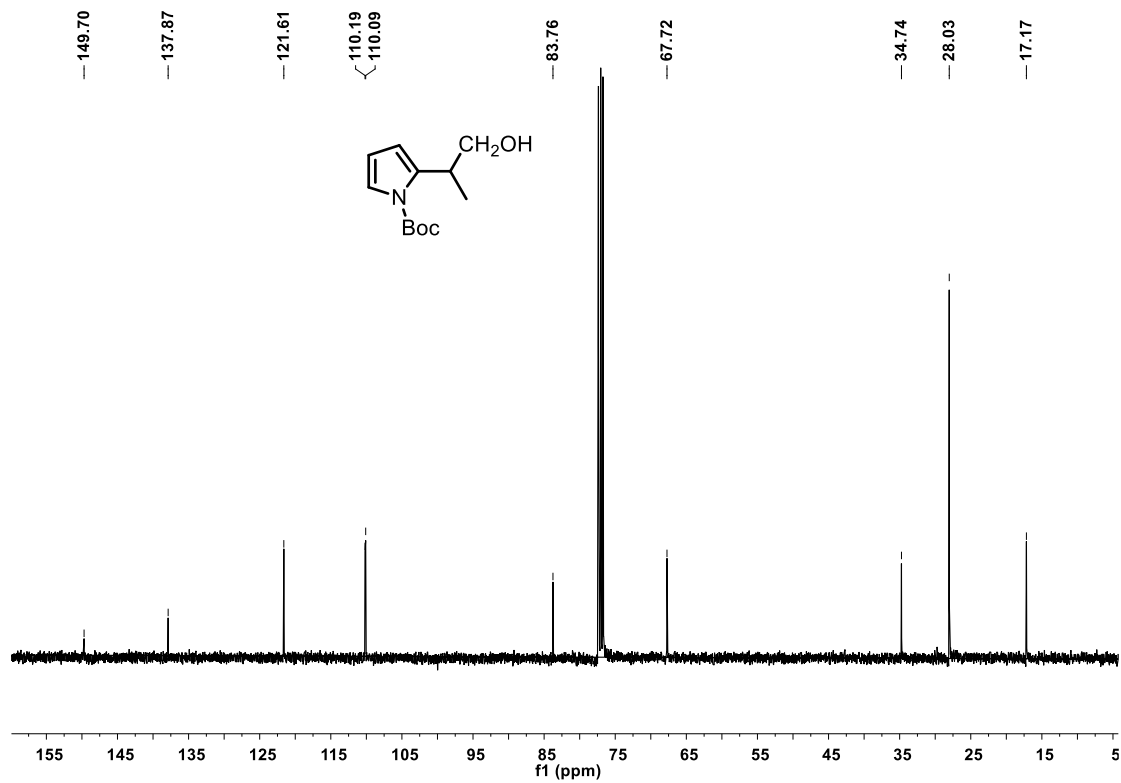

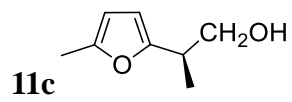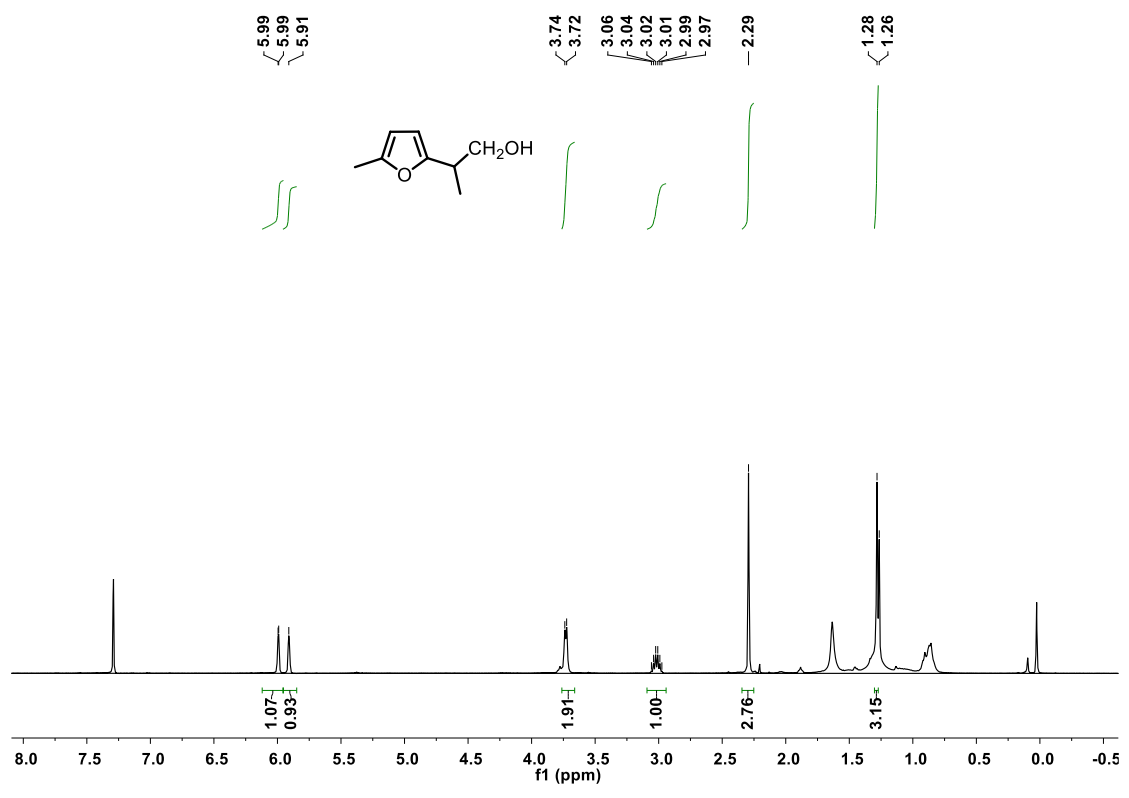

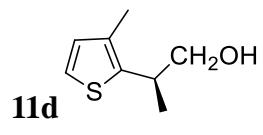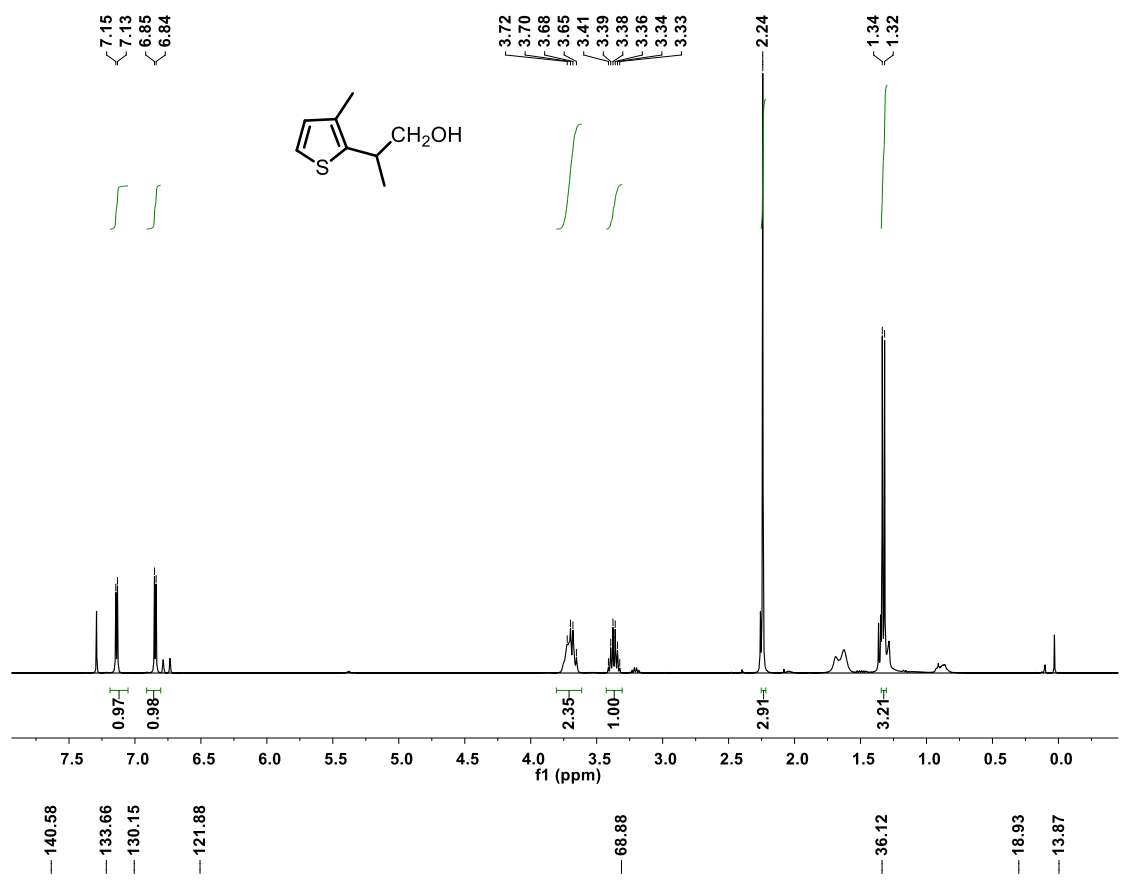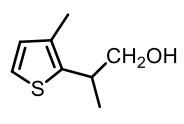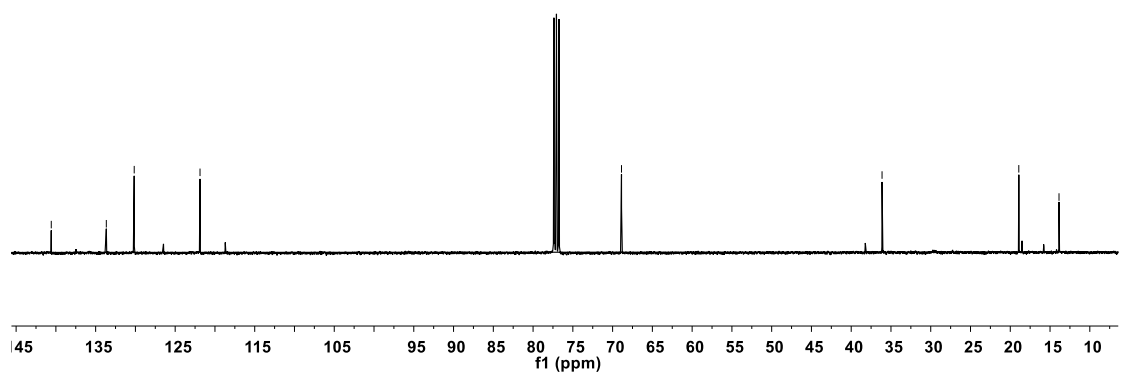

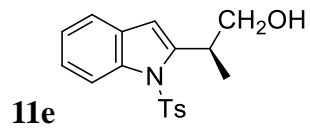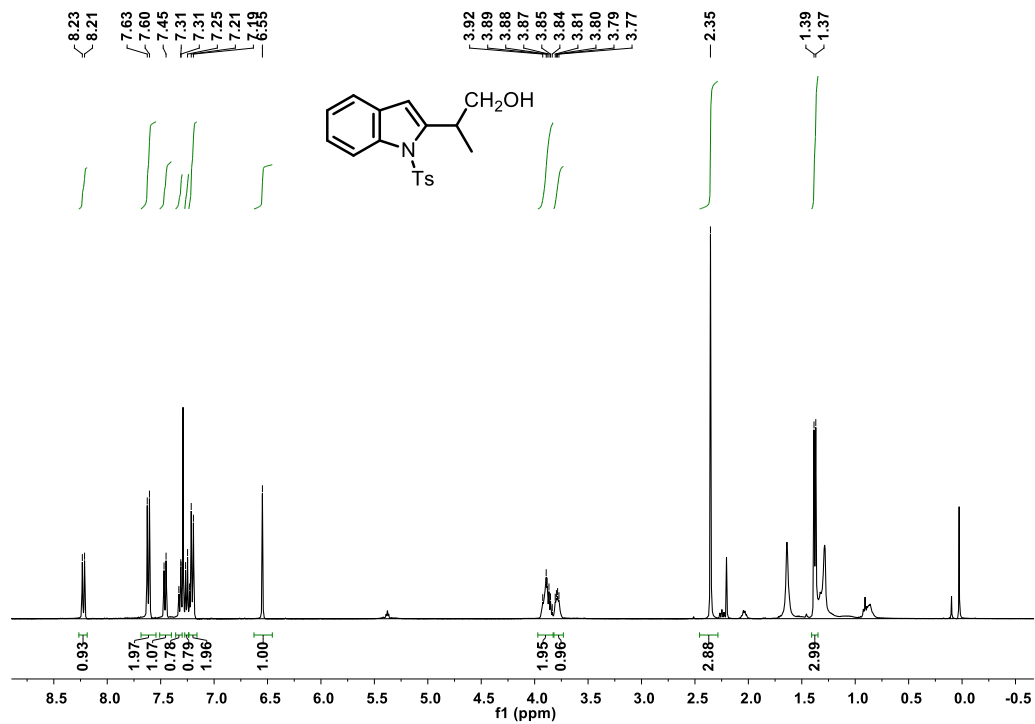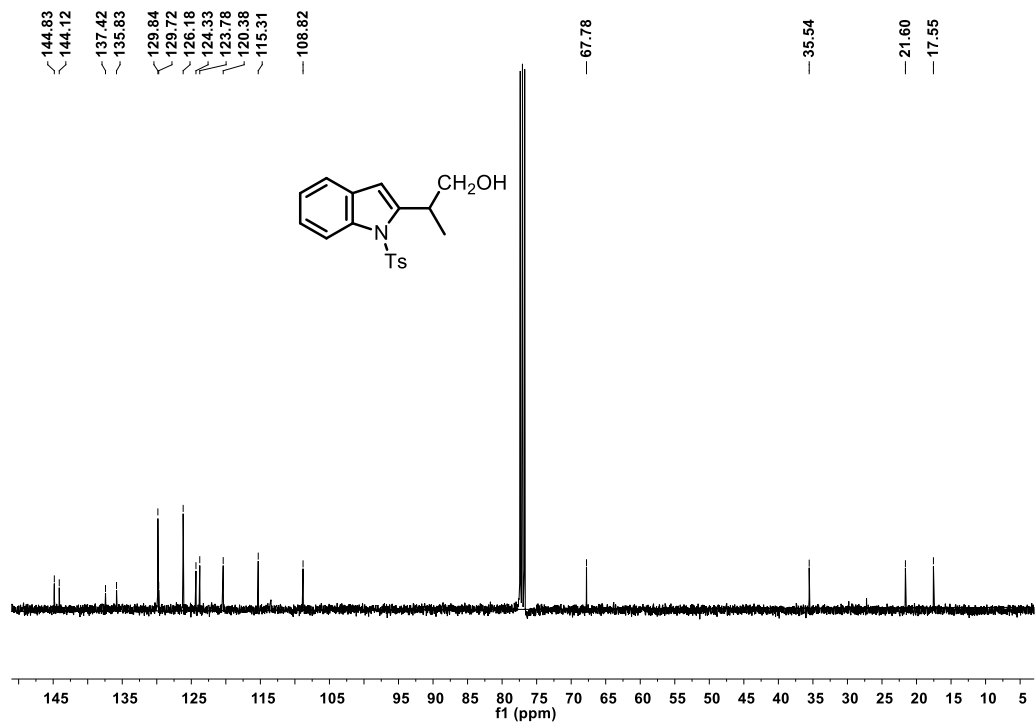

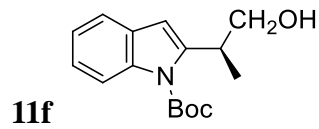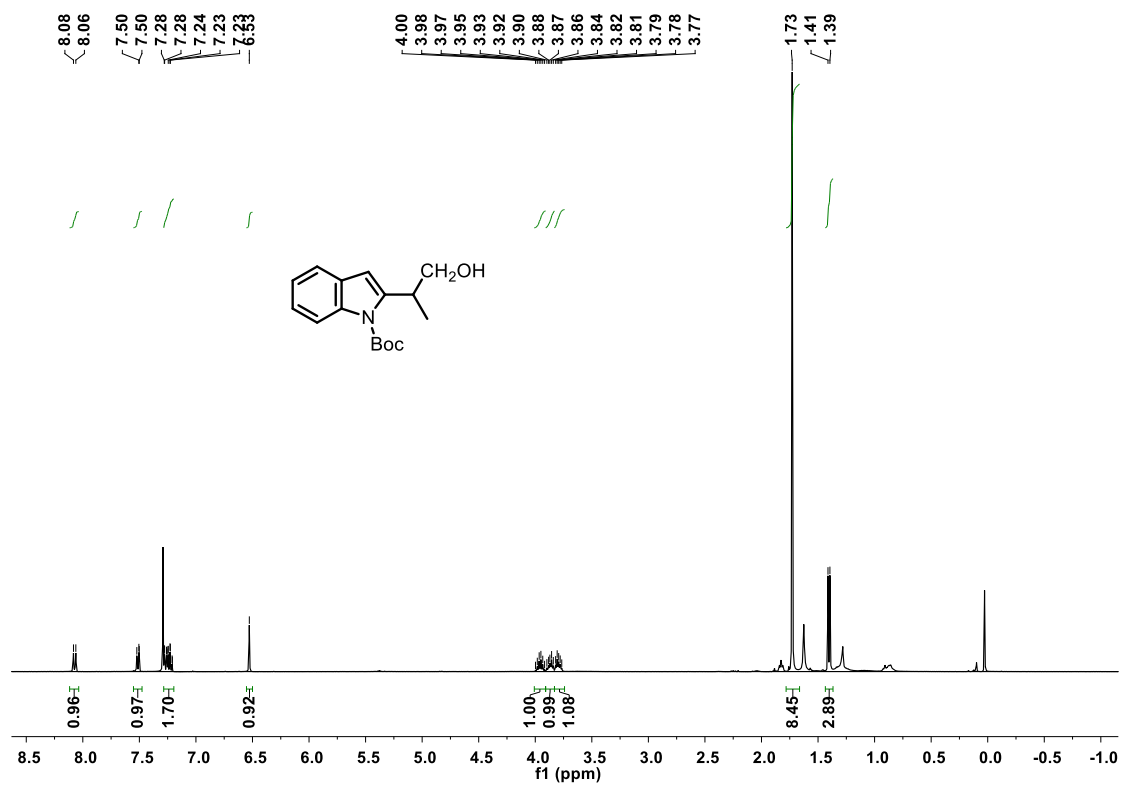

**11g**

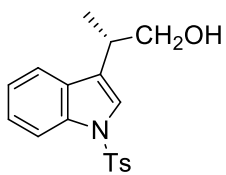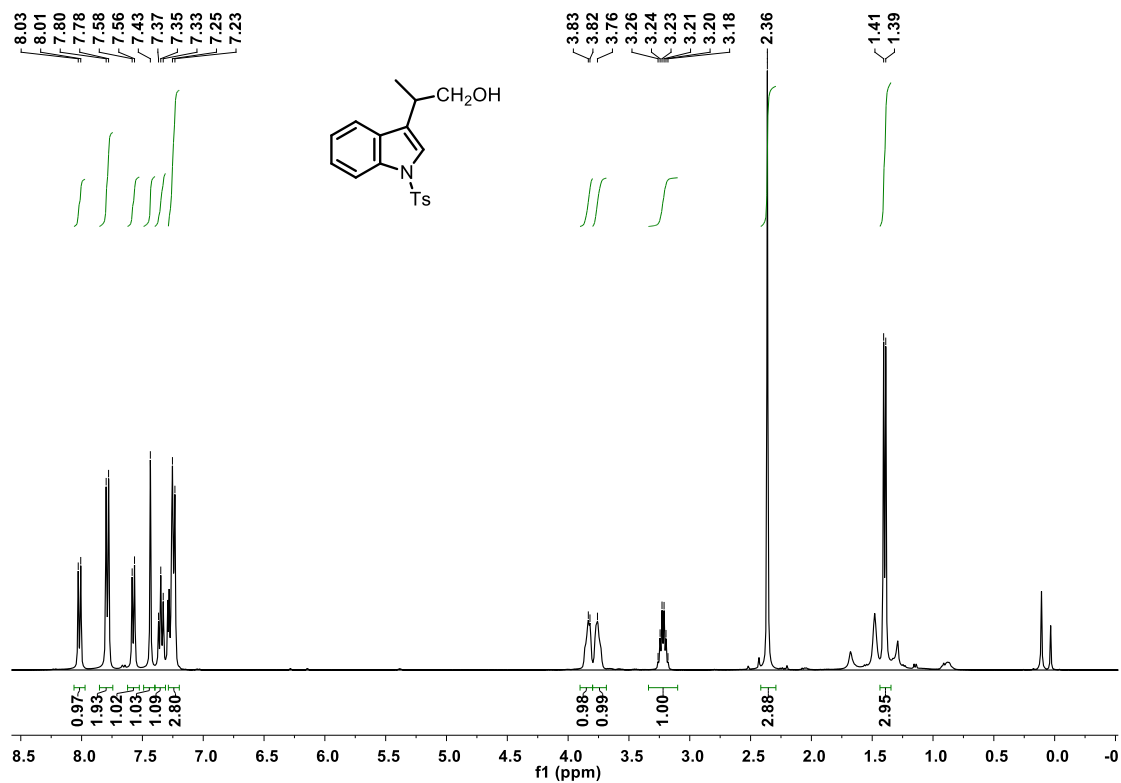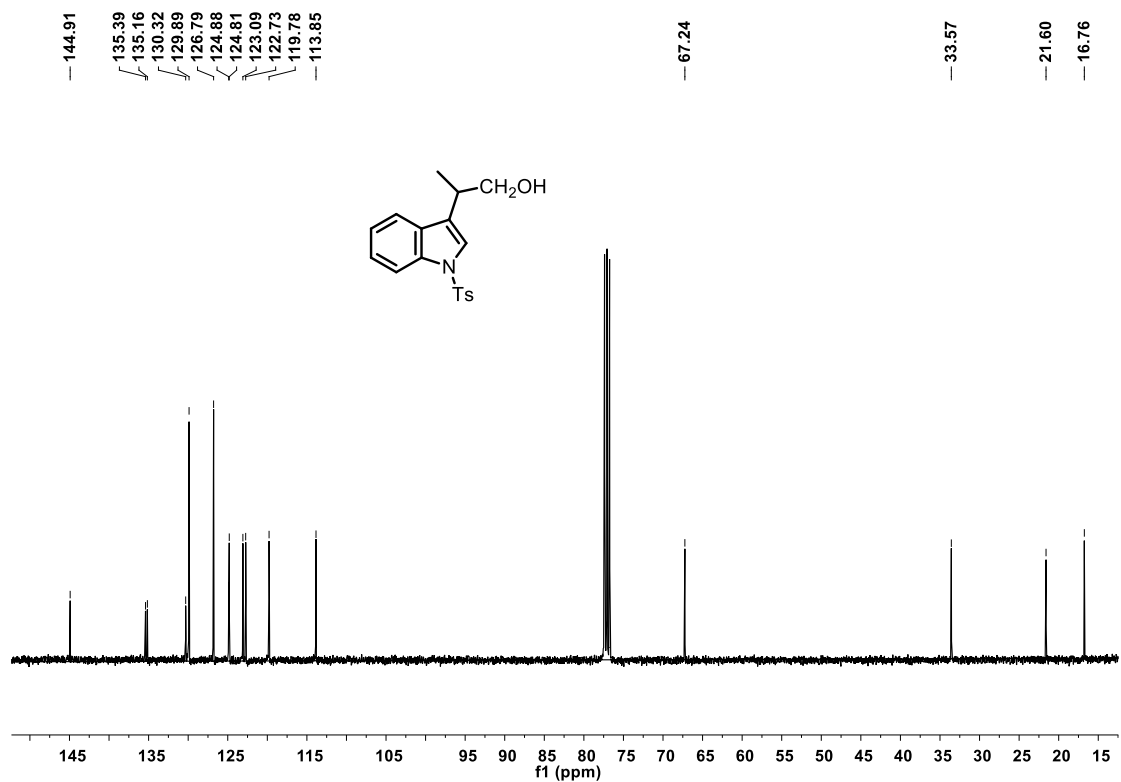

11h

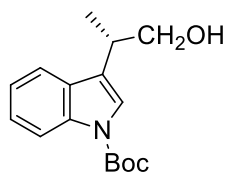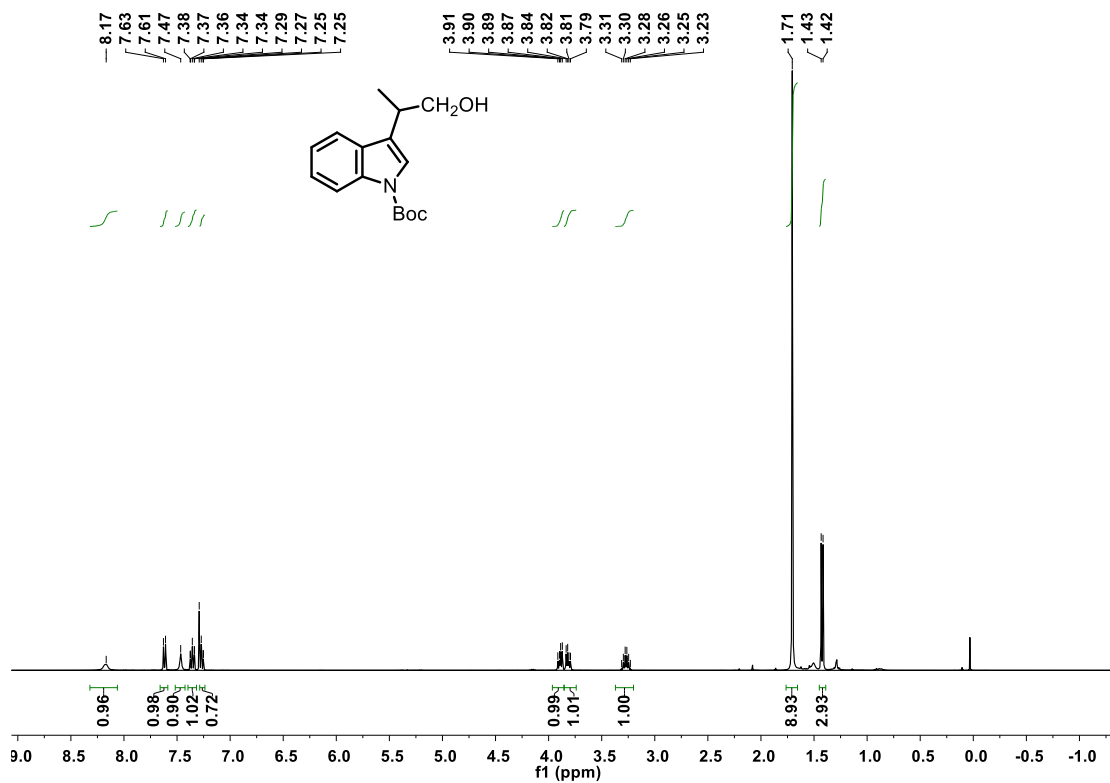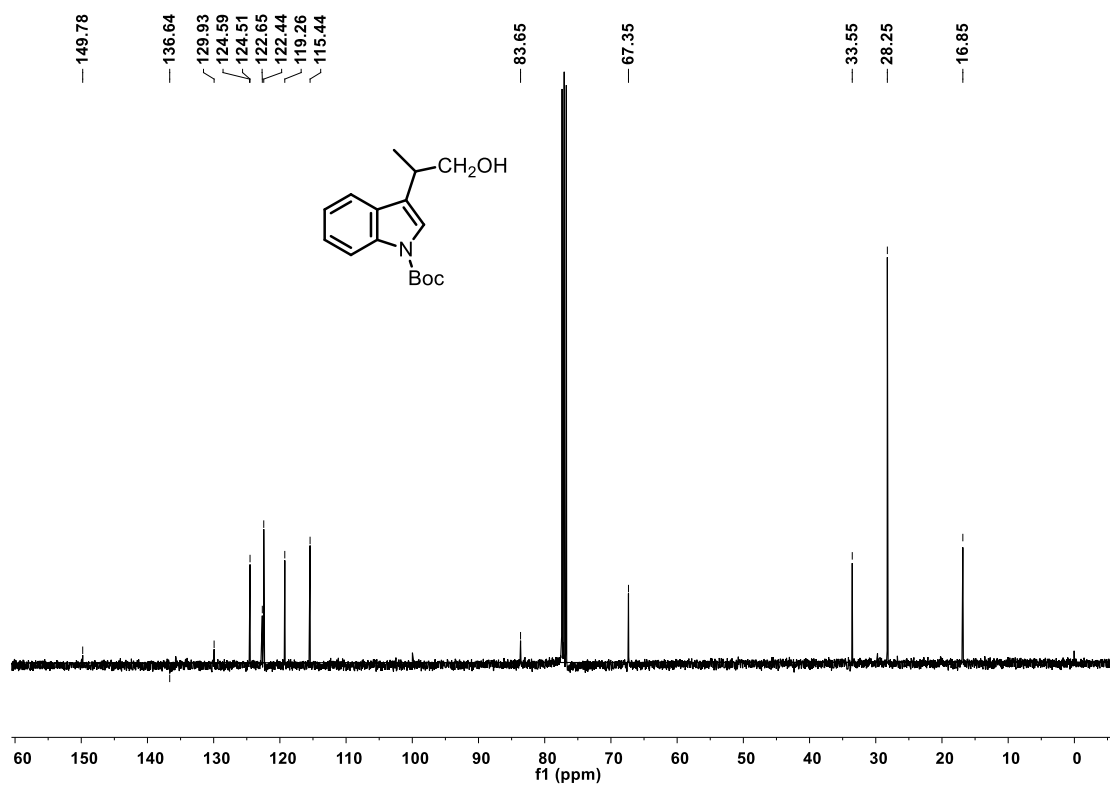



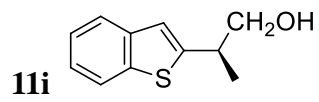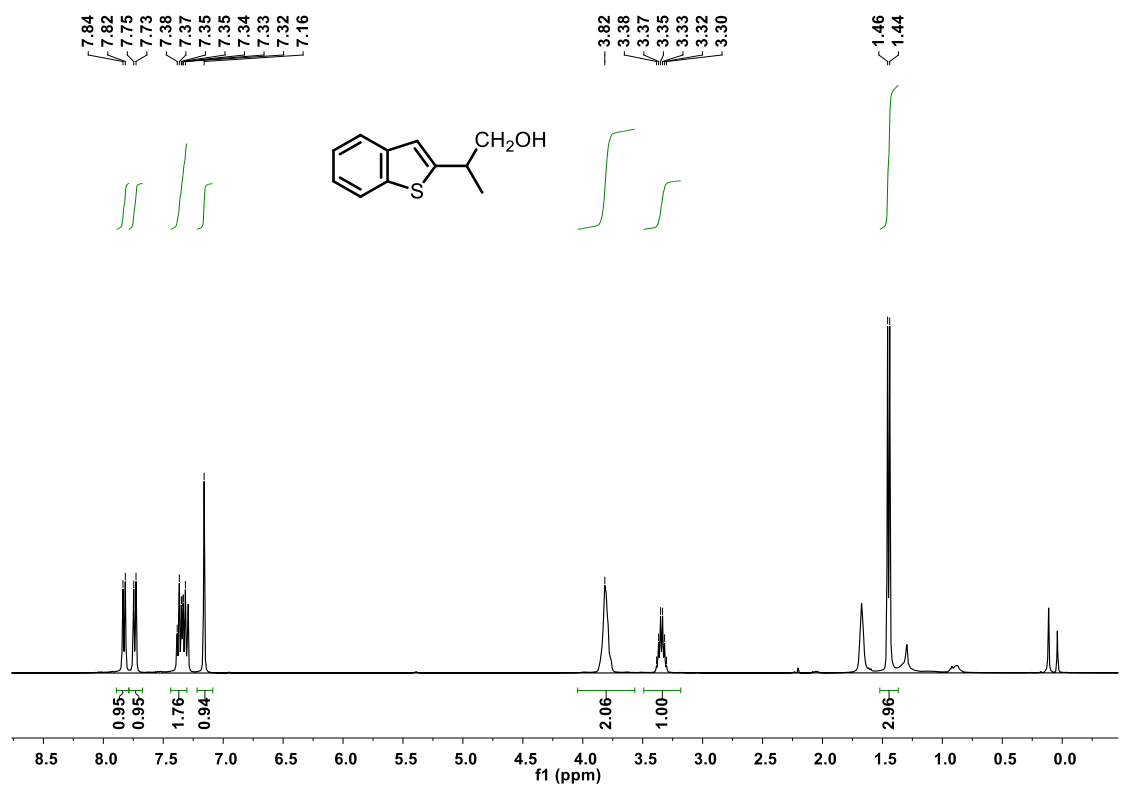

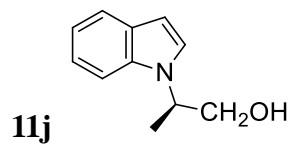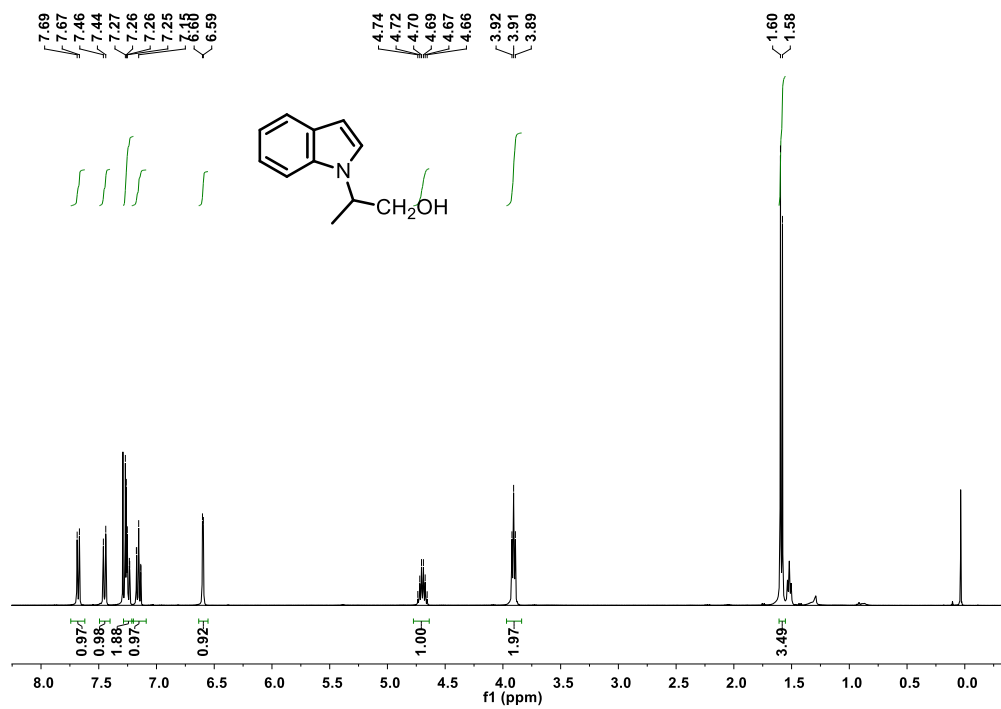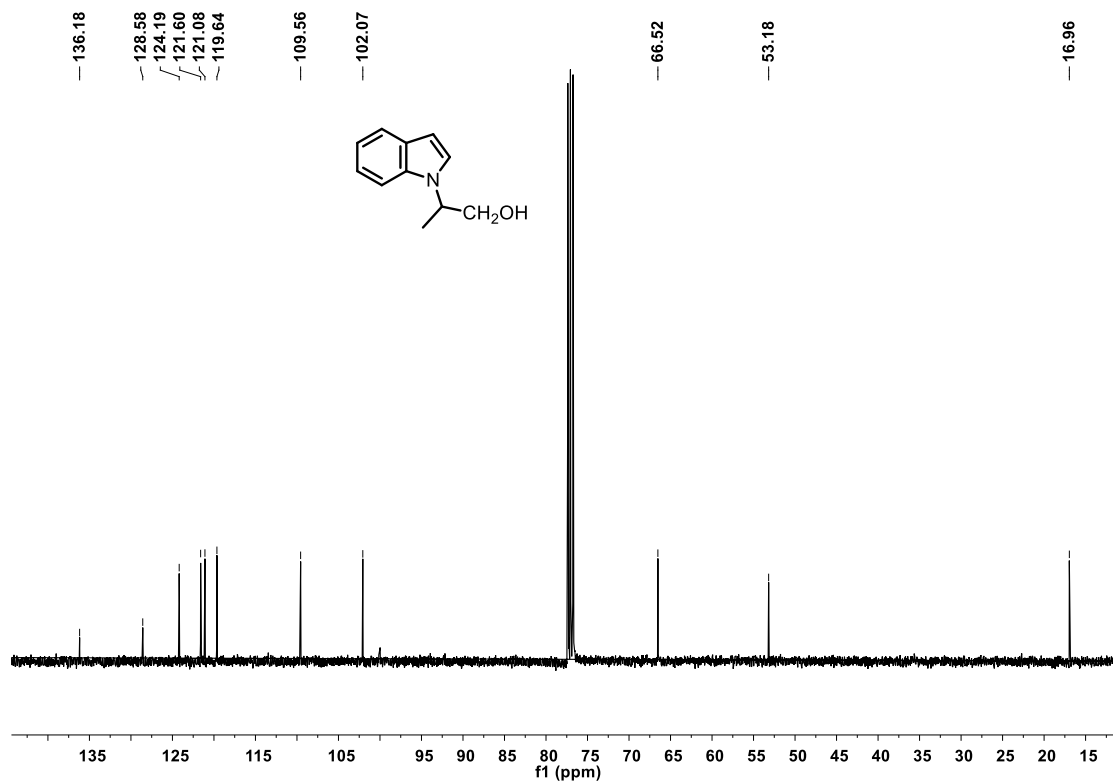

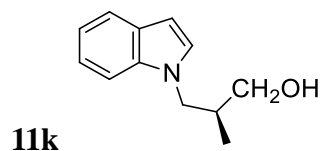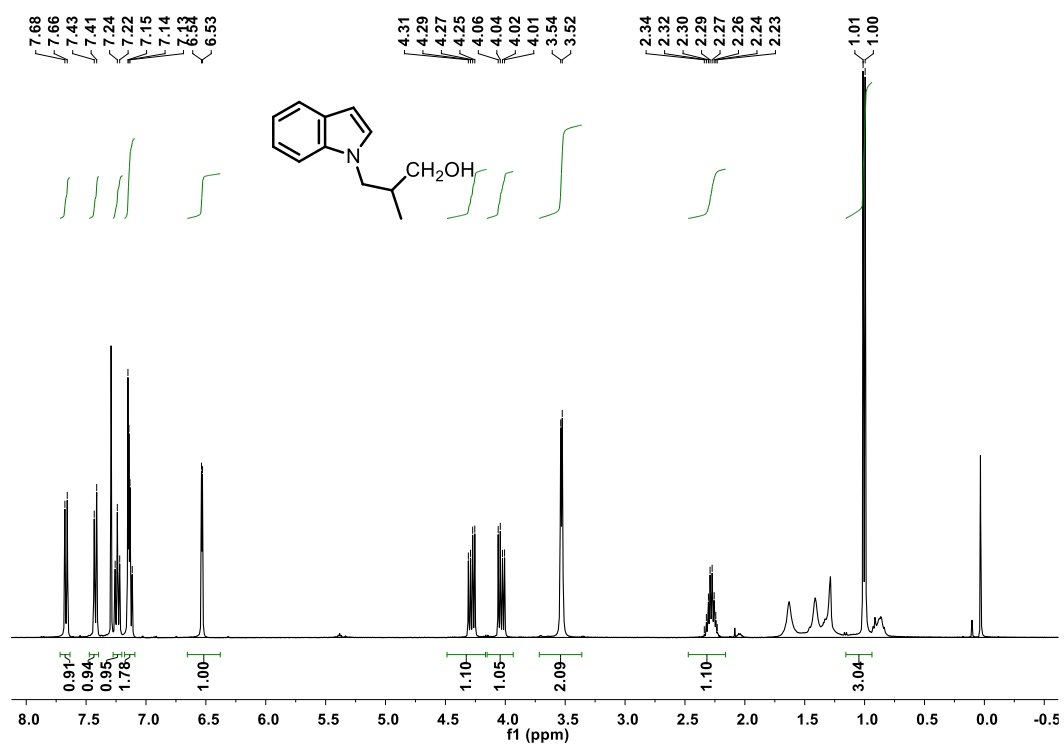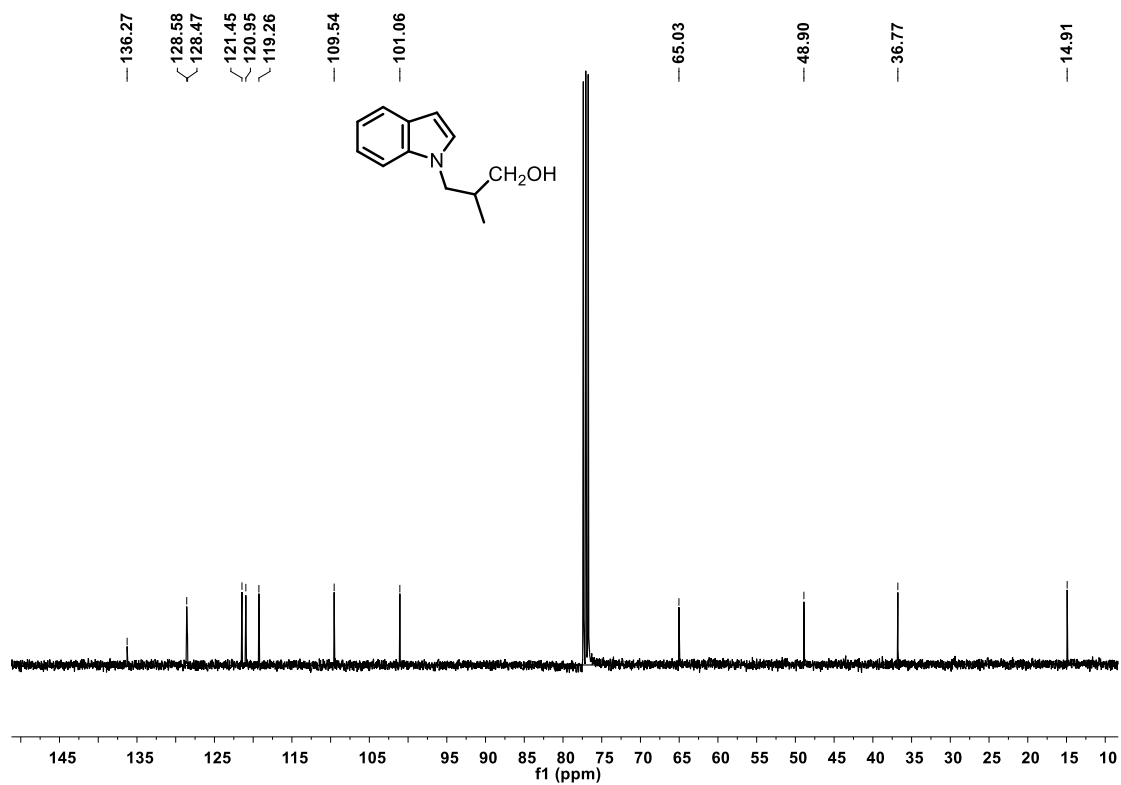

## 10. HPLC spectra for ee determination

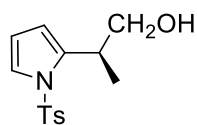

Enantiomeric excess was determined by HPLC analysis: Daicel

Chiralcel AD-H, hexane/*i*PrOH = 95:5, flow rate = 1.0 mL/min,  $\lambda$  = 220 nm,  $t_{\text{major}}$  =

32.2 min,  $t_{\text{minor}}$  = 40.2 min

Data File E:\DATA\WB\WB-20150912\VWD-AD-95-5-WB-20150912 2015-09-12 18-01-03\011-0201.D  
Sample Name: weib-20150912-1

```
=====
Acq. Operator   : SYSTEM                      Seq. Line :    2
Acq. Instrument : 1260HPLC-VMD                Location  : Vial 11
Injection Date  : 9/12/2015 6:12:38 PM        Inj       :    1
                                           Inj Volume: 5.000 µl
Acq. Method     : E:\DATA\WB\WB-20150912\VWD-AD-95-5-WB-20150912 2015-09-12 18-01-03\VWD-
ADH(1-2)-95-5-1ML-220NM-50MIN.M
Last changed    : 9/12/2015 6:01:03 PM by SYSTEM
Analysis Method : E:\DATA\WB\WB-20150912\VWD-AD-95-5-WB-20150912 2015-09-12 18-01-03\VWD-
ADH(1-2)-95-5-1ML-220NM-50MIN.M (Sequence Method)
Last changed    : 3/27/2016 2:18:06 PM by SYSTEM
                 (modified after loading)
Additional Info : Peak(s) manually integrated
=====
```

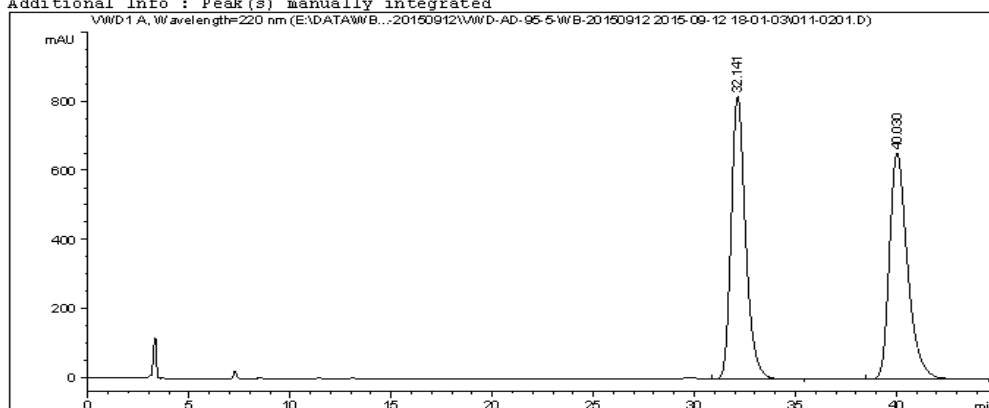

### Area Percent Report

```
Sorted By      : Signal
Multiplier     : 1.0000
Dilution       : 1.0000
Do not use Multiplier & Dilution Factor with ISTDs
```

Signal 1: VWD1 A, Wavelength=220 nm

| Peak # | RetTime [min] | Type | Width [min] | Area [mAU*s] | Height [mAU] | Area %  |
|--------|---------------|------|-------------|--------------|--------------|---------|
| 1      | 32.141        | BB   | 0.7547      | 4.04313e4    | 819.35242    | 49.9533 |
| 2      | 40.030        | BB   | 0.9375      | 4.05069e4    | 654.07281    | 50.0467 |

Totals : 8.09382e4 1473.42523

\*\*\* End of Report \*\*\*

Data File E:\DATA\WB\WB-20150915\VWD-AD-95-5-WB-20150914 2015-09-15 20-26-38\011-0201.D  
 Sample Name: weib-20150915-1

```

=====
Acq. Operator   : SYSTEM                      Seq. Line :    2
Acq. Instrument : 1260HPLC-VWD                 Location  : Vial 11
Injection Date  : 9/15/2015 8:38:14 PM        Inj       :    1
                                           Inj Volume: 5.000 µl
Acq. Method     : E:\DATA\WB\WB-20150915\VWD-AD-95-5-WB-20150914 2015-09-15 20-26-38\VWD-
                  ADH(1-2)-95-5-1ML-220NM-50MIN.M
Last changed    : 9/15/2015 8:26:39 PM by SYSTEM
Analysis Method : E:\DATA\WB\WB-20150915\VWD-AD-95-5-WB-20150914 2015-09-15 20-26-38\VWD-
                  ADH(1-2)-95-5-1ML-220NM-50MIN.M (Sequence Method)
Last changed    : 3/27/2016 2:20:07 PM by SYSTEM
                  (modified after loading)
Additional Info : Peak(s) manually integrated
  
```

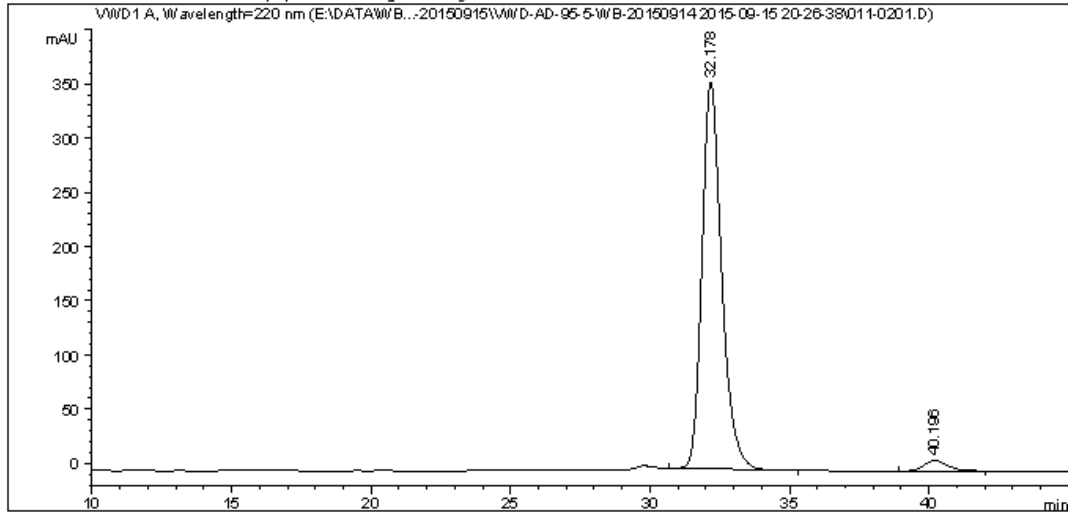

=====  
 Area Percent Report  
 =====

```

Sorted By      :      Signal
Multiplier     :      1.0000
Dilution       :      1.0000
Do not use Multiplier & Dilution Factor with ISTDs
  
```

Signal 1: VWD1 A, Wavelength=220 nm

| Peak # | RetTime [min] | Type | Width [min] | Area [mAU*s] | Height [mAU] | Area %  |
|--------|---------------|------|-------------|--------------|--------------|---------|
| 1      | 32.178        | BB   | 0.7444      | 1.74604e4    | 355.87524    | 96.8814 |
| 2      | 40.196        | BB   | 0.8831      | 562.05292    | 9.52958      | 3.1186  |

Totals :                    1.80225e4   365.40483

=====  
 \*\*\* End of Report \*\*\*

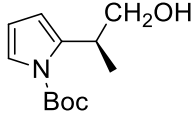

Enantiomeric excess was determined by HPLC analysis: Daicel

Chiralcel AD-H, hexane/*i*PrOH = 90:10, flow rate = 1.0 mL/min,  $\lambda = 220$  nm,  $t_{\text{major}} = 5.1$  min,  $t_{\text{minor}} = 5.5$  min

Data File E:\DATA\WB\WB-20160303\VWD-AD-90-10-WB-20160303 2016-03-03 08-45-25\049-0201.D  
 Sample Name: weib-20160303-1

```

=====
Acq. Operator   : SYSTEM                      Seq. Line :    2
Acq. Instrument : 1260HPLC-VWD                Location  : Vial 49
Injection Date  : 3/3/2016 8:57:05 AM         Inj       :    1
                                           Inj Volume: 5.000 µl
Acq. Method     : E:\DATA\WB\WB-20160303\VWD-AD-90-10-WB-20160303 2016-03-03 08-45-25\VWD-
                  ADH(1-6)-90-10-1ML-220NM-50MIN.M
Last changed    : 3/3/2016 8:45:25 AM by SYSTEM
Analysis Method : E:\DATA\WB\WB-20160303\VWD-AD-90-10-WB-20160303 2016-03-03 08-45-25\VWD-
                  ADH(1-6)-90-10-1ML-220NM-50MIN.M (Sequence Method)
Last changed    : 3/27/2016 2:00:52 PM by SYSTEM
                  (modified after loading)
Additional Info  : Peak(s) manually integrated
  
```

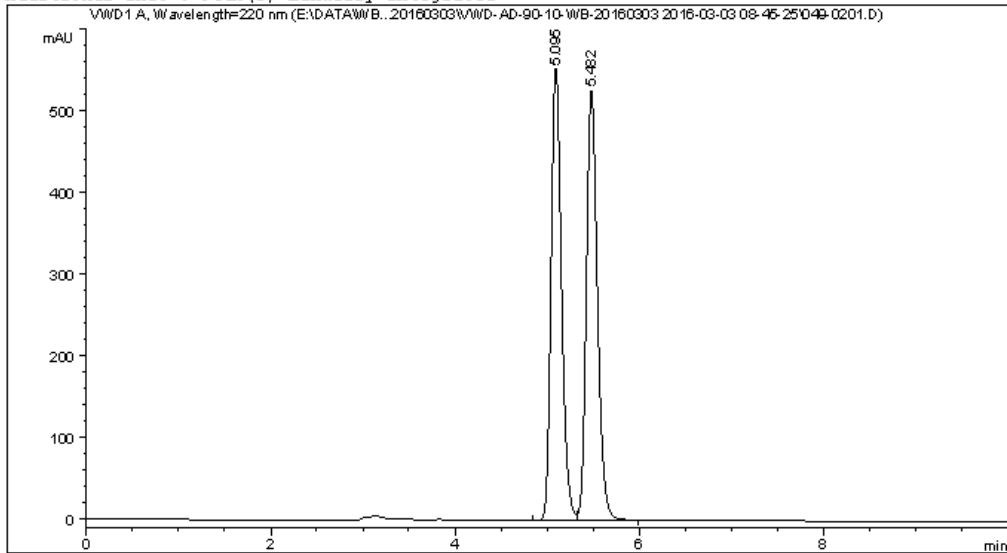

=====  
 Area Percent Report  
 =====

```

Sorted By      :      Signal
Multiplier     :      1.0000
Dilution       :      1.0000
Do not use Multiplier & Dilution Factor with ISTDs
  
```

Signal 1: VWD1 A, Wavelength=220 nm

| Peak # | RetTime [min] | Type | Width [min] | Area [mAU*s] | Height [mAU] | Area %  |
|--------|---------------|------|-------------|--------------|--------------|---------|
| 1      | 5.095         | VV   | 0.1210      | 4373.16553   | 554.48450    | 49.9110 |
| 2      | 5.482         | VB   | 0.1274      | 4388.75342   | 525.80615    | 50.0890 |

Totals :                    8761.91895 1080.29065

=====  
 \*\*\* End of Report \*\*\*

Data File E:\DATA\WB\WB-20160303\VWD-AD-90-10-WB-20160303 2016-03-03 08-45-25\050-0301.D  
 Sample Name: weib-20160303-1

```

=====
Acq. Operator   : SYSTEM                      Seq. Line :    3
Acq. Instrument : 1260HPLC-VWD                Location  : Vial 50
Injection Date  : 3/3/2016 9:47:52 AM        Inj       :    1
                                           Inj Volume: 5.000 µl
Acq. Method     : E:\DATA\WB\WB-20160303\VWD-AD-90-10-WB-20160303 2016-03-03 08-45-25\VWD-
                  ADH(1-6)-90-10-1ML-220NM-50MIN.M
Last changed    : 3/3/2016 10:08:01 AM by SYSTEM
                  (modified after loading)
Analysis Method : E:\DATA\WB\WB-20160303\VWD-AD-90-10-WB-20160303 2016-03-03 08-45-25\VWD-
                  ADH(1-6)-90-10-1ML-220NM-50MIN.M (Sequence Method)
Last changed    : 3/27/2016 2:04:11 PM by SYSTEM
                  (modified after loading)
Additional Info : Peak(s) manually integrated
  
```

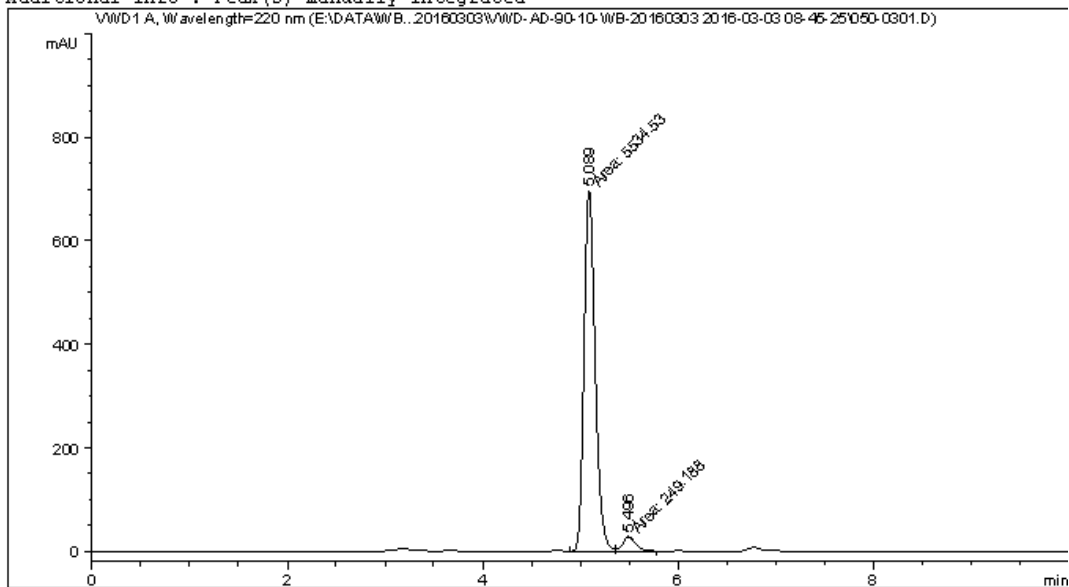

=====  
 Area Percent Report  
 =====

```

Sorted By      : Signal
Multiplier     : 1.0000
Dilution       : 1.0000
Do not use Multiplier & Dilution Factor with ISTDs
  
```

Signal 1: VWD1 A, Wavelength=220 nm

| Peak # | RetTime [min] | Type | Width [min] | Area [mAU*s] | Height [mAU] | Area %  |
|--------|---------------|------|-------------|--------------|--------------|---------|
| 1      | 5.089         | MF   | 0.1324      | 5534.52783   | 696.87225    | 95.6916 |
| 2      | 5.496         | FM   | 0.1478      | 249.18770    | 28.09358     | 4.3084  |

Totals :                    5783.71553   724.96583

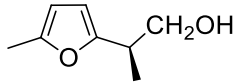

Enantiomeric excess was determined by HPLC analysis: Daicel

Chiralcel AS-H, hexane/*i*PrOH = 95:5, flow rate = 1.0 mL/min,  $\lambda = 220$  nm,  $t_{\text{major}} =$

7.2 min,  $t_{\text{minor}} = 7.6$  min

Data File E:\DATA\WB\WB-20151216-4\VWD-AD-95-5-WB-20151216S 2015-12-16 18-34-07\096-0501.D  
 Sample Name: weib-20151216-za-5

```

=====
Acq. Operator   : SYSTEM                      Seq. Line :    5
Acq. Instrument : 1260HPLC-VWD                 Location  : Vial 96
Injection Date  : 12/16/2015 8:48:00 PM       Inj       :    1
                                           Inj Volume: 5.000 µl
Acq. Method     : E:\DATA\WB\WB-20151216-4\VWD-AD-95-5-WB-20151216S 2015-12-16 18-34-07
                  \VWD-AS(1-6)-95-5-1ML-5U-220NM-40MIN.M
Last changed    : 12/16/2015 6:34:08 PM by SYSTEM
Analysis Method : E:\DATA\WB\WB-20151216-4\VWD-AD-95-5-WB-20151216S 2015-12-16 18-34-07
                  \VWD-AS(1-6)-95-5-1ML-5U-220NM-40MIN.M (Sequence Method)
Last changed    : 3/27/2016 2:33:13 PM by SYSTEM
                  (modified after loading)
Additional Info : Peak(s) manually integrated
  
```

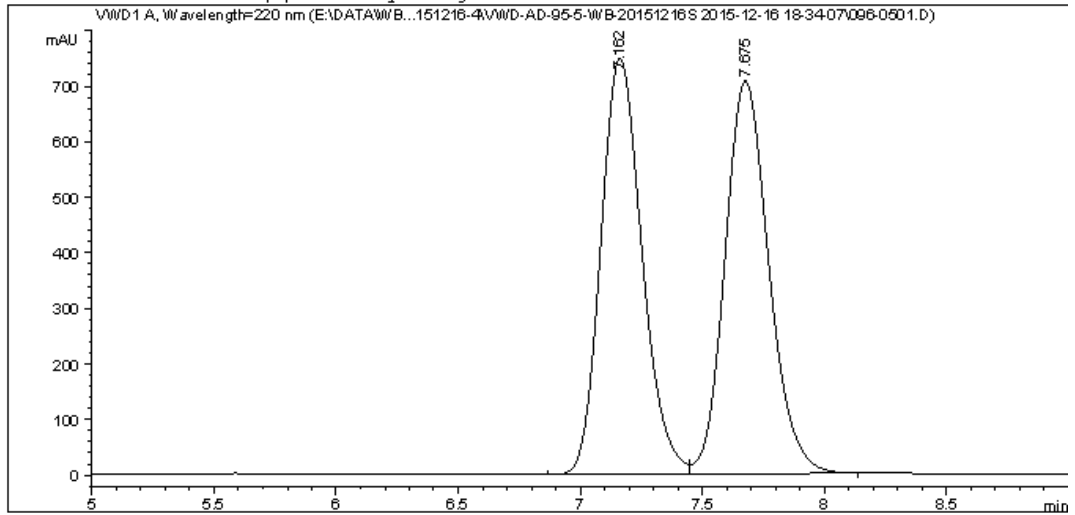

```

=====
                          Area Percent Report
=====
  
```

```

Sorted By      :      Signal
Multiplier     :      1.0000
Dilution       :      1.0000
Do not use Multiplier & Dilution Factor with ISTDs
  
```

Signal 1: VWD1 A, Wavelength=220 nm

| Peak # | RetTime [min] | Type | Width [min] | Area [mAU*s] | Height [mAU] | Area %  |
|--------|---------------|------|-------------|--------------|--------------|---------|
| 1      | 7.162         | BV   | 0.1813      | 8739.21191   | 748.31024    | 49.8280 |
| 2      | 7.675         | WB   | 0.1933      | 8799.54492   | 706.72589    | 50.1720 |

Totals : 1.75388e4 1455.03613

```

=====
*** End of Report ***
  
```



```
=====
Acq. Operator   : SYSTEM                      Seq. Line :    2
Acq. Instrument : 1260HPLC-VWD                Location  : Vial 66
Injection Date  : 12/22/2015 12:40:02 PM      Inj       :    1
                                           Inj Volume: 5.000 µl
Acq. Method     : E:\DATA\WB\WB-20151222-1\VWD-AS-95-5-WB-20151222 2015-12-22 12-27-32\VWD
                  -AS(1-6)-95-5-1ML-5U-220NM-15MIN.M
Last changed    : 12/22/2015 12:27:32 PM by SYSTEM
Analysis Method : E:\DATA\WB\WB-20151222-1\VWD-AS-95-5-WB-20151222 2015-12-22 12-27-32\VWD
                  -AS(1-6)-95-5-1ML-5U-220NM-15MIN.M (Sequence Method)
Last changed    : 3/27/2016 2:35:05 PM by SYSTEM
                  (modified after loading)
Additional Info : Peak(s) manually integrated
=====
```

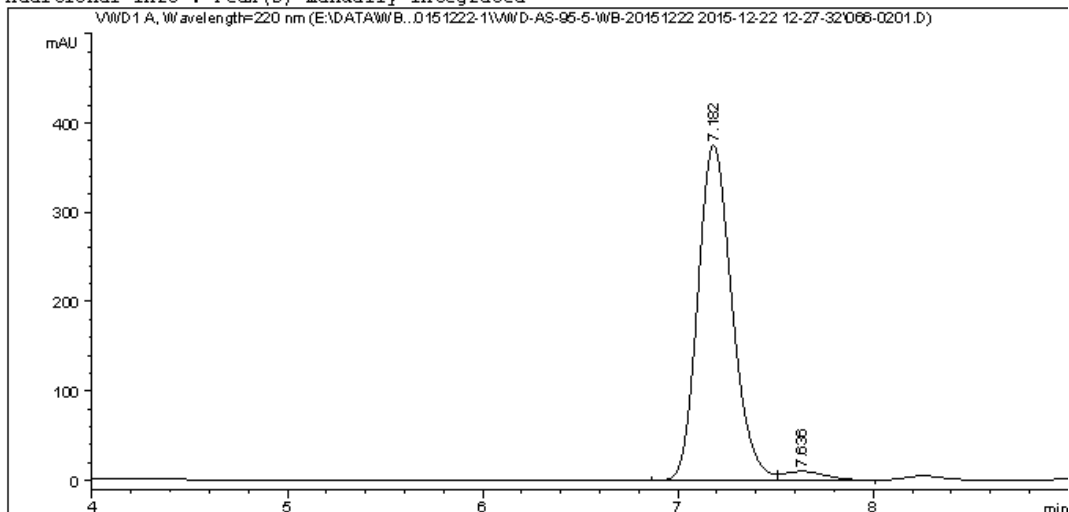

=====  
Area Percent Report  
=====

Sorted By : Signal  
Multiplier : 1.0000  
Dilution : 1.0000  
Do not use Multiplier & Dilution Factor with ISTDs

Signal 1: VWD1 A, Wavelength=220 nm

| Peak # | RetTime [min] | Type | Width [min] | Area [mAU*s] | Height [mAU] | Area %  |
|--------|---------------|------|-------------|--------------|--------------|---------|
| 1      | 7.182         | BV   | 0.1873      | 4541.74219   | 374.91458    | 96.9673 |
| 2      | 7.636         | VV   | 0.2204      | 142.04477    | 9.83837      | 3.0327  |

Totals : 4683.78696 384.75295

=====  
\*\*\* End of Report \*\*\*

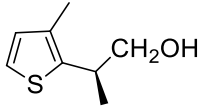

Enantiomeric excess was determined by HPLC analysis: Daicel Chiralcel AS-H, hexane/*i*PrOH = 95:5, flow rate = 1.0 mL/min,  $\lambda$  = 220 nm,  $t_{\text{major}}$  = 7.2 min,  $t_{\text{minor}}$  = 8.2 min

Data File E:\DATA\WB\WB-20151216-4\VWD-AD-95-5-WB-20151216S 2015-12-16 18-34-07\097-0601.D  
 Sample Name: weib-20151216-za-6

```

=====
Acq. Operator   : SYSTEM                      Seq. Line :    6
Acq. Instrument : 1260HPLC-VWD                Location  : Vial 97
Injection Date  : 12/16/2015 9:28:46 PM      Inj       :    1
                                           Inj Volume: 5.000 µl
Acq. Method     : E:\DATA\WB\WB-20151216-4\VWD-AD-95-5-WB-20151216S 2015-12-16 18-34-07
                                           \VWD-AS (1-6)-95-5-1ML-5U-220NM-40MIN.M
Last changed    : 12/16/2015 6:34:08 PM by SYSTEM
Analysis Method : E:\DATA\WB\WB-20151216-4\VWD-AD-95-5-WB-20151216S 2015-12-16 18-34-07
                                           \VWD-AS (1-6)-95-5-1ML-5U-220NM-40MIN.M (Sequence Method)
Last changed    : 3/27/2016 2:12:48 PM by SYSTEM
                                           (modified after loading)
Additional Info : Peak(s) manually integrated
  
```

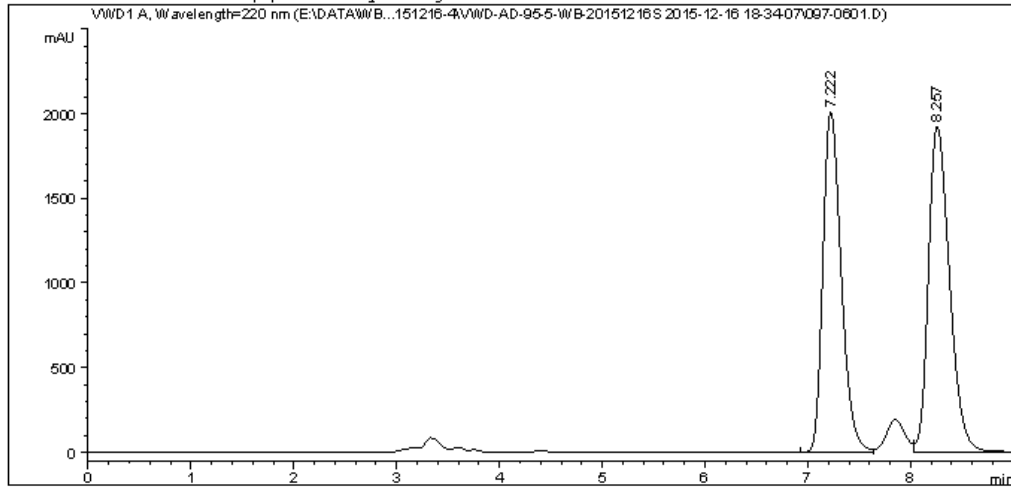

```

=====
                          Area Percent Report
=====
  
```

```

Sorted By      :      Signal
Multiplier     :      1.0000
Dilution      :      1.0000
Do not use Multiplier & Dilution Factor with ISTDs
  
```

Signal 1: VWD1 A, Wavelength=220 nm

| Peak # | RetTime [min] | Type | Width [min] | Area [mAU*s] | Height [mAU] | Area %  |
|--------|---------------|------|-------------|--------------|--------------|---------|
| 1      | 7.222         | BV   | 0.1920      | 2.47679e4    | 2006.74084   | 47.6247 |
| 2      | 8.257         | VB   | 0.2204      | 2.72385e4    | 1921.49268   | 52.3753 |

```
Totals :                      5.20065e4  3928.23352
```

```

=====
*** End of Report ***
  
```

Data File E:\DATA\WB\WB-20151226\VWD-AS-95-5-WB-20151226 2015-12-26 09-31-41\097-0201.D  
Sample Name: weib-20151226-1

```
=====
Acq. Operator   : SYSTEM                      Seq. Line :    2
Acq. Instrument : 1260HPLC-VWD                Location  : Vial 97
Injection Date  : 12/26/2015 9:43:45 AM      Inj       :    1
                                           Inj Volume: 5.000 µl
Acq. Method     : E:\DATA\WB\WB-20151226\VWD-AS-95-5-WB-20151226 2015-12-26 09-31-41\VWD-
                  AS(1-6)-95-5-1ML-5U-22ONM-15MIN.M
Last changed    : 12/26/2015 9:31:41 AM by SYSTEM
Analysis Method : E:\DATA\WB\WB-20151226\VWD-AS-95-5-WB-20151226 2015-12-26 09-31-41\VWD-
                  AS(1-6)-95-5-1ML-5U-22ONM-15MIN.M (Sequence Method)
Last changed    : 3/27/2016 2:15:06 PM by SYSTEM
                  (modified after loading)
Additional Info  : Peak(s) manually integrated
=====
```

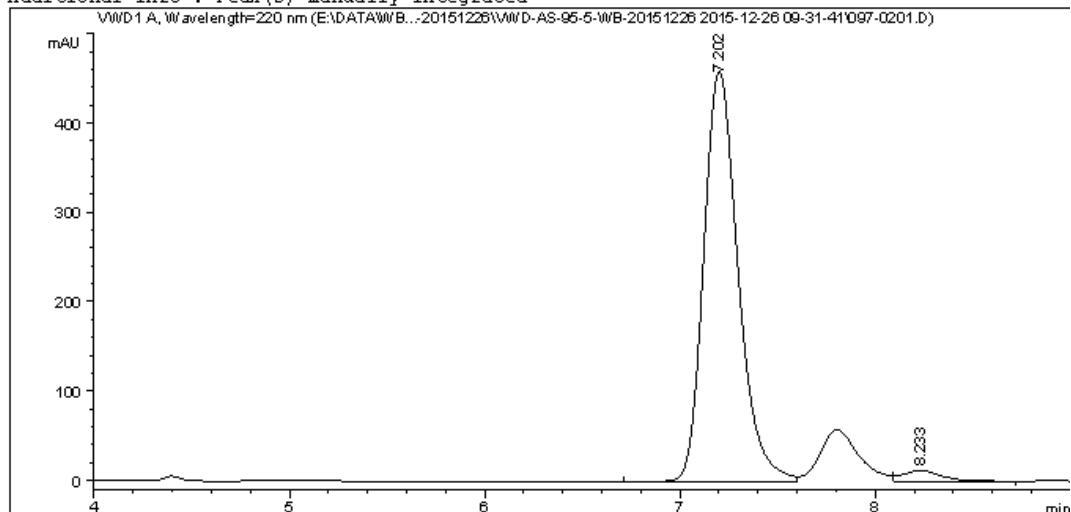

=====  
Area Percent Report  
=====

Sorted By : Signal  
Multiplier : 1.0000  
Dilution : 1.0000  
Do not use Multiplier & Dilution Factor with ISTDs

Signal 1: VWD1 A, Wavelength=220 nm

| Peak # | RetTime [min] | Type | Width [min] | Area [mAU*s] | Height [mAU] | Area %  |
|--------|---------------|------|-------------|--------------|--------------|---------|
| 1      | 7.202         | BV   | 0.1872      | 5591.02051   | 458.65384    | 97.1526 |
| 2      | 8.233         | VB   | 0.2087      | 163.86201    | 11.82037     | 2.8474  |

Totals : 5754.88252 470.47421

=====  
\*\*\* End of Report \*\*\*

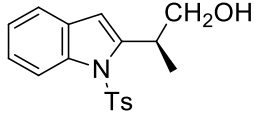

Enantiomeric excess was determined by HPLC analysis: Daicel

Chiralcel AD-H, hexane/*i*PrOH = 80:20, flow rate = 1.0 mL/min,  $\lambda = 220$  nm,  $t_{\text{major}} = 13.8$  min,  $t_{\text{minor}} = 29.3$  min

Data File E:\DATA\WB\WB-20160127\VWD-AD-95-5-WB-20160127-2 2016-01-27 20-17-00\009-0201.D  
 Sample Name: weib-20160127-9

```

=====
Acq. Operator   : SYSTEM                      Seq. Line :    2
Acq. Instrument : 1260HPLC-VWD                 Location  : Vial 9
Injection Date  : 1/27/2016 8:28:35 PM        Inj       :    1
                                                Inj Volume: 5.000 µl
Acq. Method     : E:\DATA\WB\WB-20160127\VWD-AD-95-5-WB-20160127-2 2016-01-27 20-17-00\VWD
                  -AD(1-6)-80-20-1ML-5U-220NM-40MIN.M
Last changed    : 1/27/2016 8:17:00 PM by SYSTEM
Analysis Method : E:\DATA\WB\WB-20160127\VWD-AD-95-5-WB-20160127-2 2016-01-27 20-17-00\VWD
                  -AD(1-6)-80-20-1ML-5U-220NM-40MIN.M (Sequence Method)
Last changed    : 3/27/2016 2:42:38 PM by SYSTEM
                  (modified after loading)
Additional Info : Peak(s) manually integrated
  
```

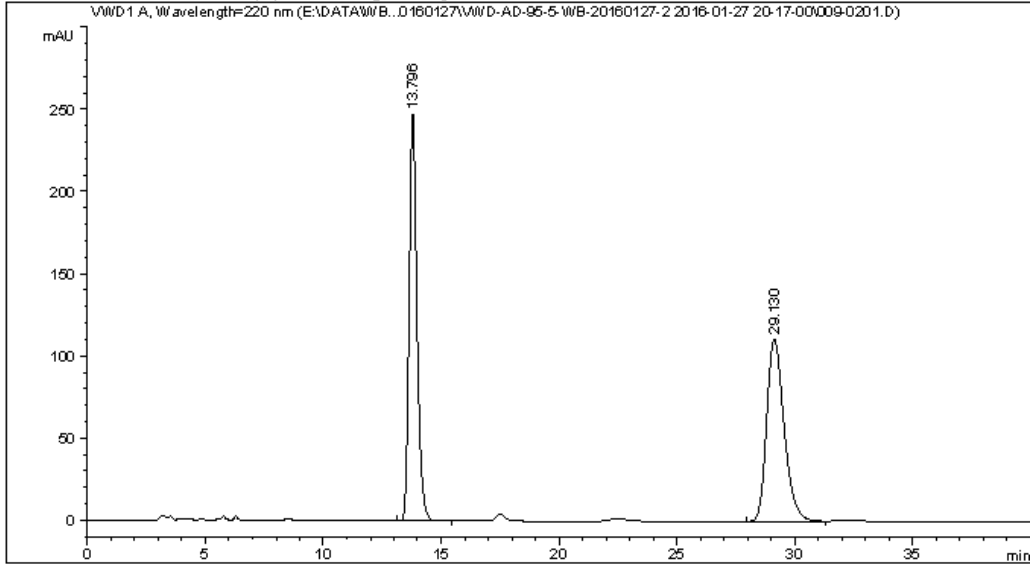

=====  
 Area Percent Report  
 =====

```

Sorted By      :      Signal
Multiplier     :      1.0000
Dilution      :      1.0000
Do not use Multiplier & Dilution Factor with ISTDs
  
```

Signal 1: VWD1 A, Wavelength=220 nm

| Peak # | RetTime [min] | Type | Width [min] | Area [mAU*s] | Height [mAU] | Area %  |
|--------|---------------|------|-------------|--------------|--------------|---------|
| 1      | 13.796        | BB   | 0.3530      | 5748.76221   | 247.45482    | 50.2644 |
| 2      | 29.130        | BB   | 0.7869      | 5688.29297   | 110.98508    | 49.7356 |

Totals :                    1.14371e4    358.43990

=====  
 \*\*\* End of Report \*\*\*

Data File E:\DATA\WB\WB-20160127\VWD-AD-95-5-WB-20160127-2 2016-01-27 20-17-00\010-0301.D  
 Sample Name: weib-20160127-10

```

=====
Acq. Operator   : SYSTEM                      Seq. Line :    3
Acq. Instrument : 1260HPLC-VWD                Location  : Vial 10
Injection Date  : 1/27/2016 9:09:24 PM       Inj       :    1
                                           Inj Volume: 5.000 µl
Acq. Method     : E:\DATA\WB\WB-20160127\VWD-AD-95-5-WB-20160127-2 2016-01-27 20-17-00\VWD
                  -AD(1-6)-80-20-1ML-5U-220NM-40MIN.M
Last changed    : 1/27/2016 8:17:00 PM by SYSTEM
Analysis Method : E:\DATA\WB\WB-20160127\VWD-AD-95-5-WB-20160127-2 2016-01-27 20-17-00\VWD
                  -AD(1-6)-80-20-1ML-5U-220NM-40MIN.M (Sequence Method)
Last changed    : 3/27/2016 2:44:25 PM by SYSTEM
                  (modified after loading)
Additional Info : Peak(s) manually integrated
=====
  
```

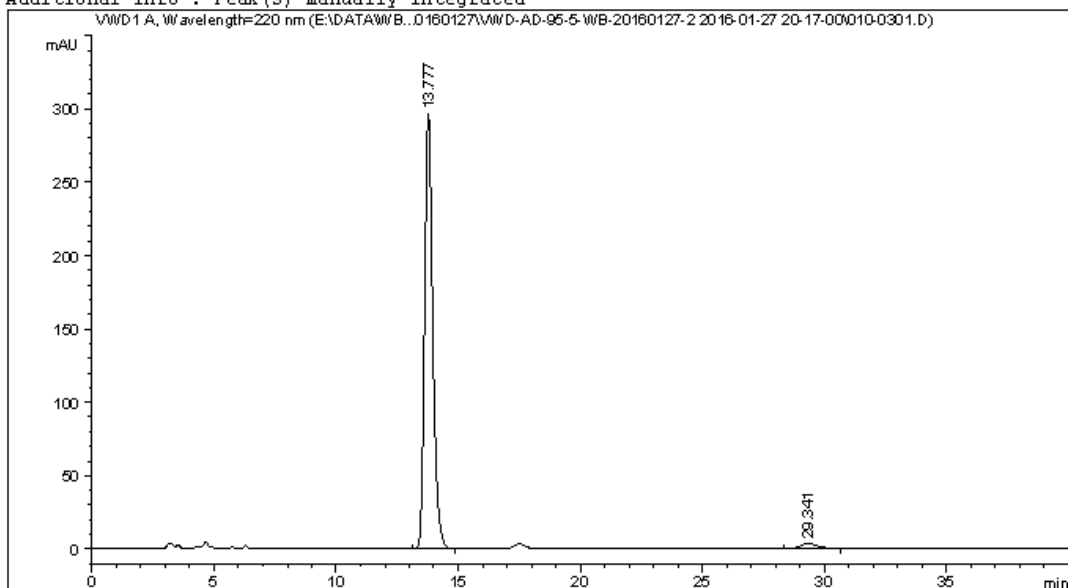

=====  
 Area Percent Report  
 =====

```

Sorted By      :      Signal
Multiplier     :      1.0000
Dilution      :      1.0000
Do not use Multiplier & Dilution Factor with ISTDs
  
```

Signal 1: VWD1 A, Wavelength=220 nm

| Peak # | RetTime [min] | Type | Width [min] | Area [mAU*s] | Height [mAU] | Area %  |
|--------|---------------|------|-------------|--------------|--------------|---------|
| 1      | 13.777        | BB   | 0.3542      | 6893.48730   | 296.52197    | 97.5910 |
| 2      | 29.341        | BB   | 0.7313      | 170.16338    | 3.45696      | 2.4090  |

Totals :                    7063.65068   299.97893

=====  
 \*\*\* End of Report \*\*\*

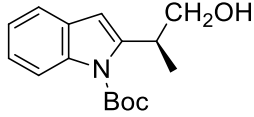

Enantiomeric excess was determined by HPLC analysis: Daicel

Chiralcel IB-H, hexane/*i*PrOH = 95:5, flow rate = 1.0 mL/min,  $\lambda = 220$  nm,  $t_{\text{minor}} = 6.9$  min,  $t_{\text{major}} = 7.3$  min

Data File E:\DATA\WB\WB-20160106\VWD-IB-95-5-WB-20160106 2016-01-06 10-17-43\010-0301.D  
 Sample Name: weib-20160106-2

```

=====
Acq. Operator   : SYSTEM                      Seq. Line :    3
Acq. Instrument : 1260HPLC-VWD                Location  : Vial 10
Injection Date  : 1/6/2016 11:10:40 AM       Inj       :    1
                                           Inj Volume: 5.000 µl
Acq. Method     : E:\DATA\WB\WB-20160106\VWD-IB-95-5-WB-20160106 2016-01-06 10-17-43\VWD-
                  IB(1-6)-95-5-1ML-220NM-40MIN.M
Last changed    : 1/6/2016 10:17:44 AM by SYSTEM
Analysis Method : E:\DATA\WB\WB-20160106\VWD-IB-95-5-WB-20160106 2016-01-06 10-17-43\VWD-
                  IB(1-6)-95-5-1ML-220NM-40MIN.M (Sequence Method)
Last changed    : 3/27/2016 1:47:44 PM by SYSTEM
                  (modified after loading)
Additional Info : Peak(s) manually integrated
  
```

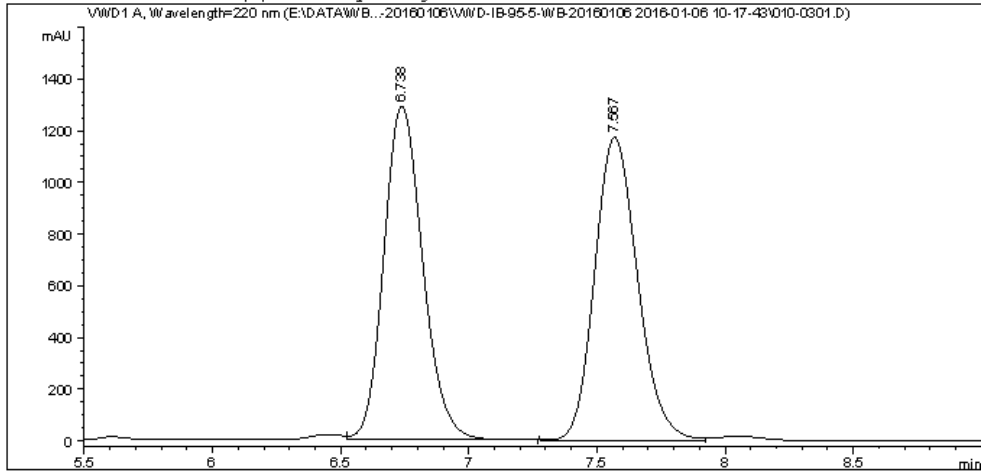

=====  
 Area Percent Report  
 =====

```

Sorted By      :      Signal
Multiplier     :      1.0000
Dilution       :      1.0000
Do not use Multiplier & Dilution Factor with ISTDs
  
```

Signal 1: VWD1 A, Wavelength=220 nm

| Peak # | RetTime [min] | Type | Width [min] | Area [mAU*s] | Height [mAU] | Area %  |
|--------|---------------|------|-------------|--------------|--------------|---------|
| 1      | 6.738         | VB   | 0.1641      | 1.36225e4    | 1290.94263   | 49.2567 |
| 2      | 7.567         | BV   | 0.1804      | 1.36274e4    | 1173.98914   | 49.2743 |
| 3      | 17.822        | BB   | 0.3877      | 59.50492     | 2.33989      | 0.2152  |
| 4      | 19.271        | BB   | 0.5792      | 182.17918    | 4.87208      | 0.6587  |
| 5      | 21.465        | BB   | 0.3794      | 54.21317     | 2.16345      | 0.1960  |
| 6      | 26.824        | BB   | 0.6550      | 110.35899    | 2.45699      | 0.3990  |

Totals :                                    2.76562e4  2476.76417

Data File E:\DATA\WB\WB-20160107\VWD-AD-95-5-WB-20160107 2016-01-07 12-29-31\019-0501.D  
 Sample Name: weib-20160107-4

```

=====
Acq. Operator   : SYSTEM                      Seq. Line :    5
Acq. Instrument : 1260HPLC-VWD                Location  : Vial 19
Injection Date  : 1/7/2016 2:14:11 PM        Inj       :    1
                                           Inj Volume: 5.000 µl
Acq. Method     : E:\DATA\WB\WB-20160107\VWD-AD-95-5-WB-20160107 2016-01-07 12-29-31\VWD-
                  IB(1-6)-95-5-1ML-220NM-40MIN.M
Last changed    : 1/7/2016 12:29:32 PM by SYSTEM
Analysis Method : E:\DATA\WB\WB-20160107\VWD-AD-95-5-WB-20160107 2016-01-07 12-29-31\VWD-
                  IB(1-6)-95-5-1ML-220NM-40MIN.M (Sequence Method)
Last changed    : 3/27/2016 1:42:26 PM by SYSTEM
                  (modified after loading)
Additional Info : Peak(s) manually integrated
  
```

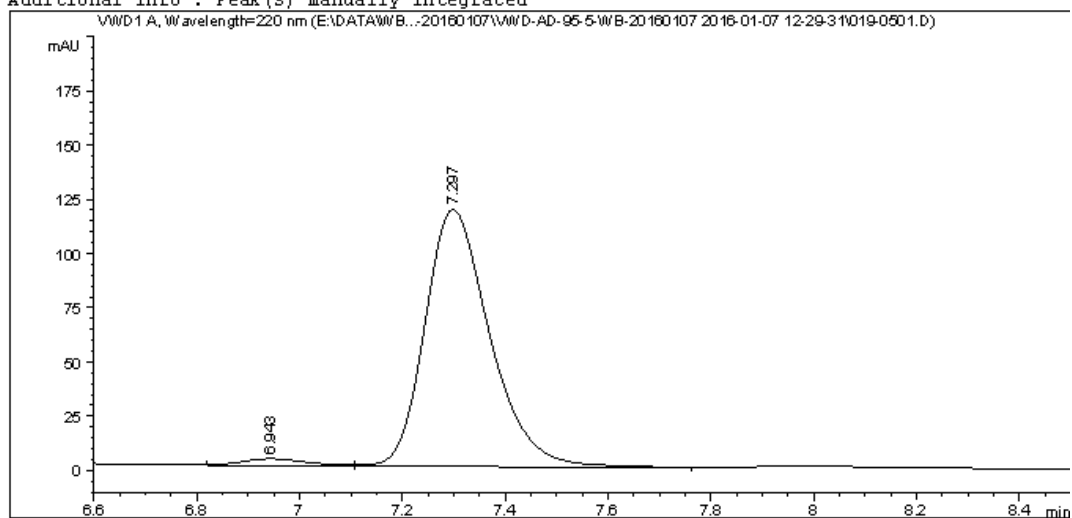

=====  
 Area Percent Report  
 =====

```

Sorted By      :      Signal
Multiplier     :      1.0000
Dilution       :      1.0000
Do not use Multiplier & Dilution Factor with ISTDs
  
```

Signal 1: VWD1 A, Wavelength=220 nm

| Peak # | RetTime [min] | Type | Width [min] | Area [mAU*s] | Height [mAU] | Area %  |
|--------|---------------|------|-------------|--------------|--------------|---------|
| 1      | 6.943         | VV   | 0.1311      | 26.34415     | 3.06968      | 2.4710  |
| 2      | 7.297         | VB   | 0.1343      | 1039.78674   | 118.53698    | 97.5290 |

Totals :                                    1066.13090    121.60666

=====  
 \*\*\* End of Report \*\*\*

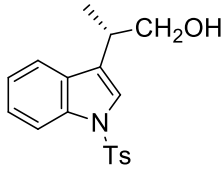

Enantiomeric excess was determined by HPLC analysis: Daicel

Chiralcel IB -H, hexane/*i*PrOH = 95:5, flow rate = 1.0 mL/min,  $\lambda = 220$  nm,  $t_{\text{major}} =$

22.7 min,  $t_{\text{minor}} = 25.3$  min

Data File E:\DATA\WB\WB-20151102\VWD-IB-95-5-WB-20151102 2015-11-02 20-28-45\003-0201.D  
 Sample Name: weib-20151102-3

```

=====
Acq. Operator   : SYSTEM                      Seq. Line :    2
Acq. Instrument : 1260HPLC-VWD                Location  : Vial 3
Injection Date  : 11/2/2015 8:40:18 PM        Inj       :    1
                                           Inj Volume: 5.000 µl
Acq. Method    : E:\DATA\WB\WB-20151102\VWD-IB-95-5-WB-20151102 2015-11-02 20-28-45\VWD-
                IB(1-6)-95-5-1ML-220NM-40MIN.M
Last changed   : 11/2/2015 8:28:45 PM by SYSTEM
Analysis Method: E:\DATA\WB\WB-20151102\VWD-IB-95-5-WB-20151102 2015-11-02 20-28-45\VWD-
                IB(1-6)-95-5-1ML-220NM-40MIN.M (Sequence Method)
Last changed   : 3/27/2016 2:30:49 PM by SYSTEM
                (modified after loading)
Additional Info : Peak(s) manually integrated
  
```

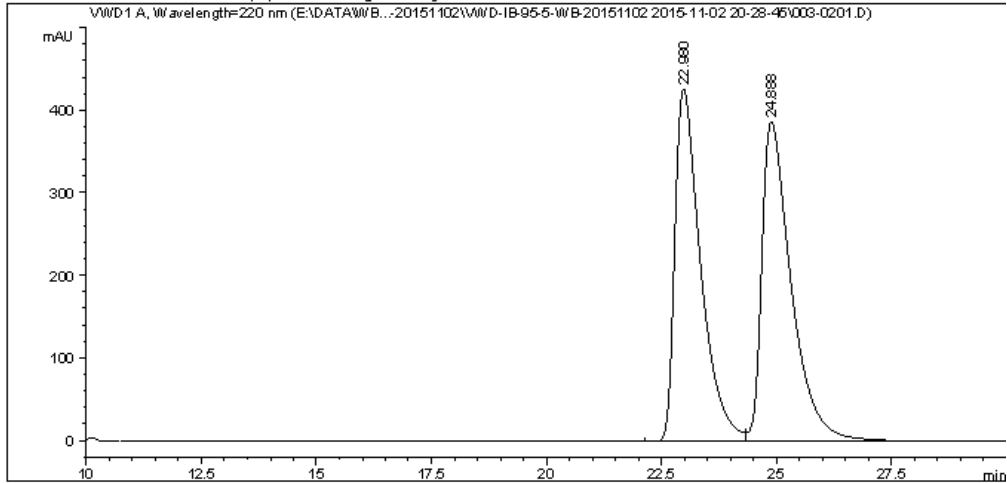

=====  
 Area Percent Report  
 =====

```

Sorted By      :      Signal
Multiplier     :      1.0000
Dilution      :      1.0000
Do not use Multiplier & Dilution Factor with ISTDs
  
```

Signal 1: VWD1 A, Wavelength=220 nm

| Peak # | RetTime [min] | Type | Width [min] | Area [mAU*s] | Height [mAU] | Area %  |
|--------|---------------|------|-------------|--------------|--------------|---------|
| 1      | 22.980        | BV   | 0.5831      | 1.66978e4    | 427.14056    | 49.0558 |
| 2      | 24.888        | VB   | 0.6662      | 1.73406e4    | 387.38220    | 50.9442 |

Totals :                                    3.40385e4    814.52277

=====  
 \*\*\* End of Report \*\*\*



```

=====
Acq. Operator   : SYSTEM                      Seq. Line :    4
Acq. Instrument : 1260HPLC-VWD                Location  : Vial 23
Injection Date  : 11/19/2015 12:43:54 PM      Inj       :    1
                                           Inj Volume: 5.000 µl
Acq. Method     : E:\DATA\WB\WEIB-20151119\VWD-IB-95-5-WB-20151119 2015-11-19 11-10-33\VWD
                  -IB(1-6)-95-5-1ML-220NM-40MIN.M
Last changed    : 11/19/2015 11:10:33 AM by SYSTEM
Analysis Method : E:\DATA\WB\WEIB-20151119\VWD-IB-95-5-WB-20151119 2015-11-19 11-10-33\VWD
                  -IB(1-6)-95-5-1ML-220NM-40MIN.M (Sequence Method)
Last changed    : 3/27/2016 2:28:54 PM by SYSTEM
                  (modified after loading)
Additional Info : Peak(s) manually integrated
  
```

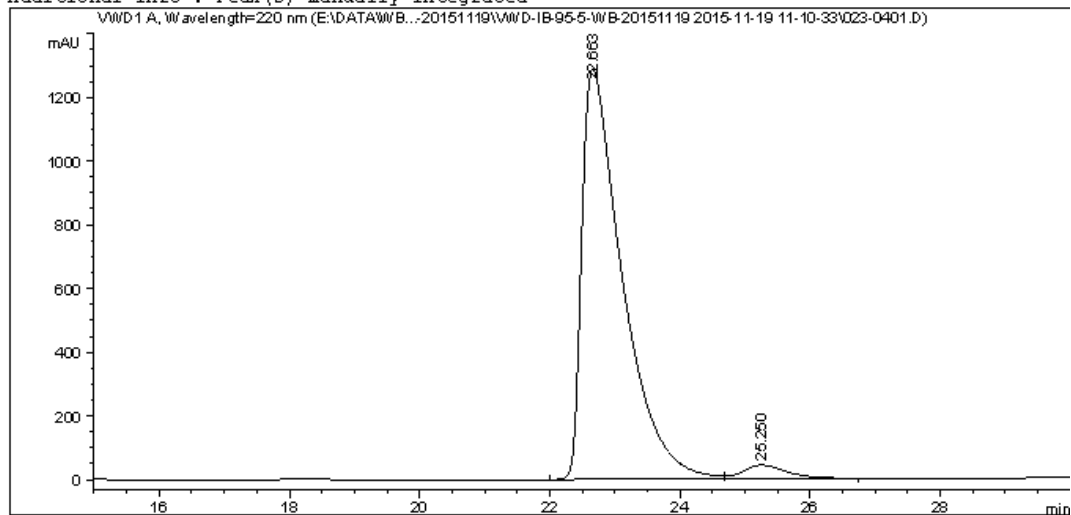

=====  
 Area Percent Report  
 =====

```

Sorted By      :      Signal
Multiplier     :      1.0000
Dilution       :      1.0000
Do not use Multiplier & Dilution Factor with ISTDs
  
```

Signal 1: VWD1 A, Wavelength=220 nm

| Peak # | RetTime [min] | Type | Width [min] | Area [mAU*s] | Height [mAU] | Area %  |
|--------|---------------|------|-------------|--------------|--------------|---------|
| 1      | 22.663        | BV   | 0.6340      | 5.55000e4    | 1287.30933   | 96.4829 |
| 2      | 25.250        | VB   | 0.6953      | 2023.12036   | 43.28545     | 3.5171  |

Totals :                    5.75231e4 1330.59478

=====  
 \*\*\* End of Report \*\*\*

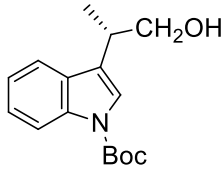

Enantiomeric excess was determined by HPLC analysis: Daicel

Chiralcel IB-H, hexane/*i*PrOH = 95:5, flow rate = 1.0 mL/min,  $\lambda = 220$  nm,  $t_{\text{major}} =$

7.4 min,  $t_{\text{minor}} = 8.2$  min

Data File E:\DATA\WB\WB-20151102\VWD-IB-95-5-WB-20151102 2015-11-02 20-28-45\004-0301.D  
 Sample Name: weib-20151102-4

```

=====
Acq. Operator   : SYSTEM                      Seq. Line :    3
Acq. Instrument : 1260HPLC-VWD                Location  : Vial 4
Injection Date  : 11/2/2015 9:21:03 PM        Inj       :    1
                                           Inj Volume: 5.000  $\mu$ l
Acq. Method     : E:\DATA\WB\WB-20151102\VWD-IB-95-5-WB-20151102 2015-11-02 20-28-45\VWD-
IB(1-6)-95-5-1ML-220NM-40MIN.M
Last changed    : 11/2/2015 8:28:45 PM by SYSTEM
Analysis Method : E:\DATA\WB\WB-20151102\VWD-IB-95-5-WB-20151102 2015-11-02 20-28-45\VWD-
IB(1-6)-95-5-1ML-220NM-40MIN.M (Sequence Method)
Last changed    : 3/27/2016 2:23:03 PM by SYSTEM
                 (modified after loading)
Additional Info : Peak(s) manually integrated
  
```

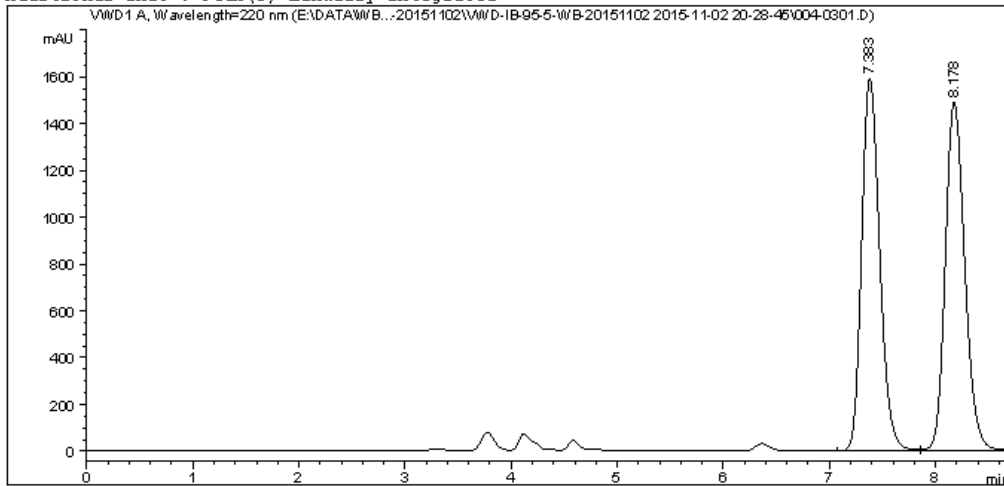

=====  
 Area Percent Report  
 =====

```

Sorted By      :      Signal
Multiplier     :      1.0000
Dilution       :      1.0000
Do not use Multiplier & Dilution Factor with ISTDs
  
```

Signal 1: VWD1 A, Wavelength=220 nm

| Peak # | RetTime [min] | Type | Width [min] | Area [mAU*s] | Height [mAU] | Area %  |
|--------|---------------|------|-------------|--------------|--------------|---------|
| 1      | 7.383         | BB   | 0.1832      | 1.87011e4    | 1589.85840   | 49.8082 |
| 2      | 8.178         | BV   | 0.1968      | 1.88451e4    | 1487.36462   | 50.1918 |

Totals :                                    3.75462e4  3077.22302

=====  
 \*\*\* End of Report \*\*\*

Data File E:\DATA\WB\WEIB-20151119\VWD-IB-95-5-WB-20151119 2015-11-19 11-10-33\024-0501.D  
 Sample Name: WEIB-20151119-4

```

=====
Acq. Operator   : SYSTEM                      Seq. Line :    5
Acq. Instrument : 1260HPLC-VWD                Location  : Vial 24
Injection Date  : 11/19/2015 1:24:35 PM      Inj       :    1
                                           Inj Volume: 5.000 µl
Acq. Method     : E:\DATA\WB\WEIB-20151119\VWD-IB-95-5-WB-20151119 2015-11-19 11-10-33\VWD
                  -IB(1-6)-95-5-1ML-220NM-40MIN.M
Last changed    : 11/19/2015 11:10:33 AM by SYSTEM
Analysis Method : E:\DATA\WB\WEIB-20151119\VWD-IB-95-5-WB-20151119 2015-11-19 11-10-33\VWD
                  -IB(1-6)-95-5-1ML-220NM-40MIN.M (Sequence Method)
Last changed    : 3/27/2016 2:25:21 PM by SYSTEM
                  (modified after loading)
Additional Info : Peak(s) manually integrated
=====
  
```

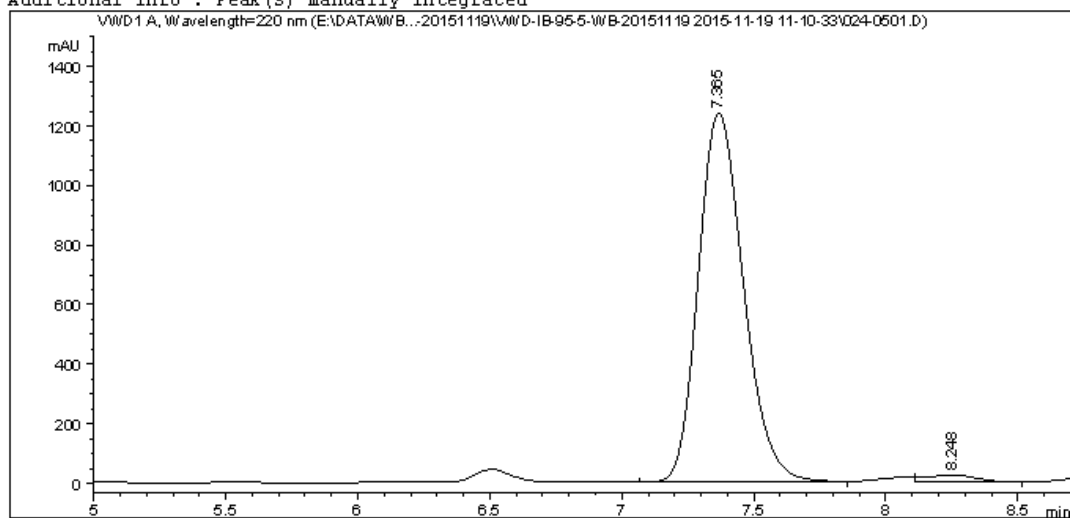

=====  
 Area Percent Report  
 =====

```

Sorted By      : Signal
Multiplier     : 1.0000
Dilution       : 1.0000
Do not use Multiplier & Dilution Factor with ISTDs
  
```

Signal 1: VWD1 A, Wavelength=220 nm

| Peak # | RetTime [min] | Type | Width [min] | Area [mAU*s] | Height [mAU] | Area %  |
|--------|---------------|------|-------------|--------------|--------------|---------|
| 1      | 7.365         | EB   | 0.1848      | 1.47444e4    | 1239.19934   | 97.9761 |
| 2      | 8.248         | VB   | 0.1963      | 304.57535    | 23.48474     | 2.0239  |

Totals : 1.50490e4 1262.68408

=====  
 \*\*\* End of Report \*\*\*

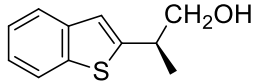

Enantiomeric excess was determined by HPLC analysis: Daicel

Chiralcel AS-H, hexane/*i*PrOH = 95:5, flow rate = 1.0 mL/min,  $\lambda = 220$  nm,  $t_{\text{minor}} = 11.5$  min,  $t_{\text{major}} = 12.4$  min

Data File E:\DATA\WB\WB-20151208-3\VWD-AS-95-5-WB-20151208 2015-12-08 17-26-05\094-0201.D  
 Sample Name: weib-20151208za-1

```

=====
Acq. Operator   : SYSTEM                      Seq. Line :    2
Acq. Instrument : 1260HPLC-VWD                Location  : Vial 94
Injection Date  : 12/8/2015 6:08:17 PM       Inj       :    1
                                           Inj Volume: 5.000 µl
Acq. Method     : E:\DATA\WB\WB-20151208-3\VWD-AS-95-5-WB-20151208 2015-12-08 17-26-05\VWD
                  -AS(1-6)-95-5-1ML-5U-220NM-40MIN.M
Last changed    : 12/8/2015 5:26:05 PM by SYSTEM
Analysis Method : E:\DATA\WB\WB-20151208-3\VWD-AS-95-5-WB-20151208 2015-12-08 17-26-05\VWD
                  -AS(1-6)-95-5-1ML-5U-220NM-40MIN.M (Sequence Method)
Last changed    : 3/27/2016 2:37:44 PM by SYSTEM
                  (modified after loading)
Additional Info : Peak(s) manually integrated
  
```

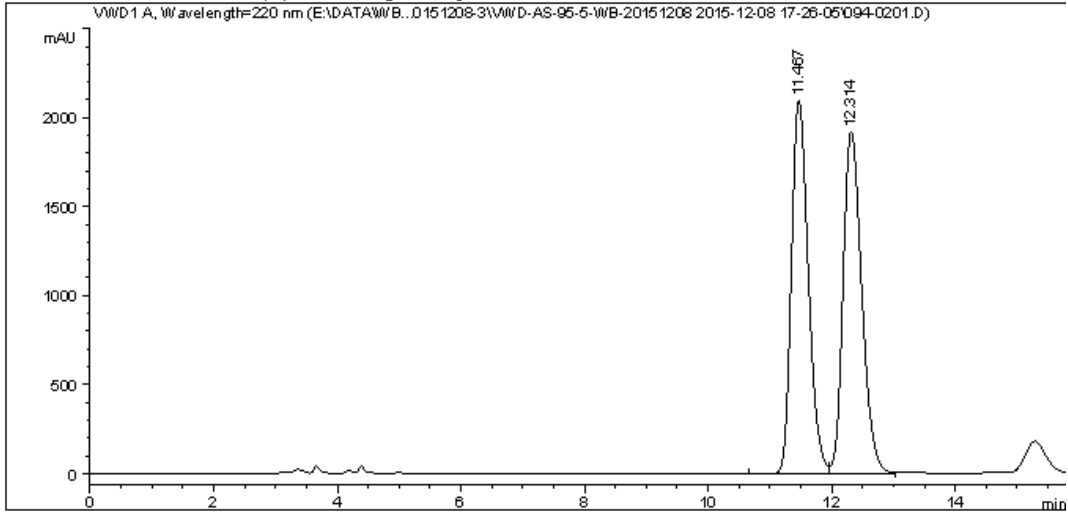

```

=====
                          Area Percent Report
=====
  
```

```

Sorted By      :      Signal
Multiplier     :      1.0000
Dilution       :      1.0000
Do not use Multiplier & Dilution Factor with ISTDs
  
```

Signal 1: VWD1 A, Wavelength=220 nm

| Peak # | RetTime [min] | Type | Width [min] | Area [mAU*s] | Height [mAU] | Area %  |
|--------|---------------|------|-------------|--------------|--------------|---------|
| 1      | 11.467        | BV   | 0.2952      | 3.97259e4    | 2094.88696   | 49.6959 |
| 2      | 12.314        | VV   | 0.3252      | 4.02121e4    | 1921.38354   | 50.3041 |

Totals :                                7.99381e4  4016.27051

```

=====
*** End of Report ***
  
```

```

=====
Acq. Operator   : SYSTEM                      Seq. Line :    2
Acq. Instrument : 1260HPLC-VWD                Location  : Vial 95
Injection Date  : 12/15/2015 7:45:49 PM      Inj       :    1
                                           Inj Volume: 5.000 µl
Acq. Method     : E:\DATA\WB\WB-20151215-2\VWD-AS-95-5-WB-20151215-2 2015-12-15 19-34-16
                  \VWD-AS(1-6)-95-5-1ML-5U-220NM-40MIN.M
Last changed    : 12/15/2015 7:34:17 PM by SYSTEM
Analysis Method : E:\DATA\WB\WB-20151215-2\VWD-AS-95-5-WB-20151215-2 2015-12-15 19-34-16
                  \VWD-AS(1-6)-95-5-1ML-5U-220NM-40MIN.M (Sequence Method)
Last changed    : 3/27/2016 2:39:57 PM by SYSTEM
                  (modified after loading)
Additional Info : Peak(s) manually integrated
  
```

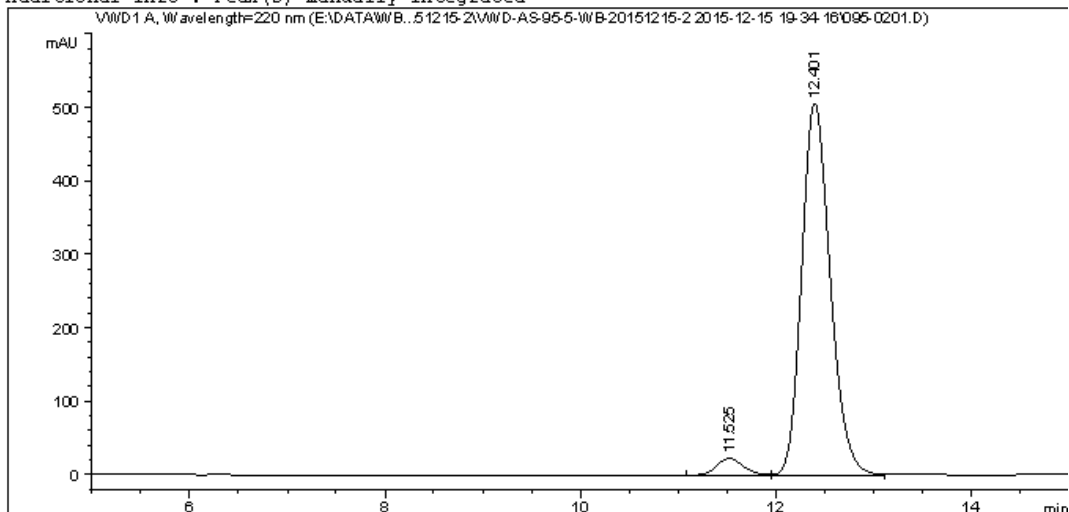

=====  
 Area Percent Report  
 =====

```

Sorted By      :      Signal
Multiplier     :      1.0000
Dilution       :      1.0000
Do not use Multiplier & Dilution Factor with ISTDs
  
```

Signal 1: VWD1 A, Wavelength=220 nm

| Peak # | RetTime [min] | Type | Width [min] | Area [mAU*s] | Height [mAU] | Area %  |
|--------|---------------|------|-------------|--------------|--------------|---------|
| 1      | 11.525        | BV   | 0.2849      | 423.10434    | 22.86581     | 3.9524  |
| 2      | 12.401        | VV   | 0.3138      | 1.02819e4    | 506.55368    | 96.0476 |

Totals :                    1.07050e4    529.41949

=====  
 \*\*\* End of Report \*\*\*

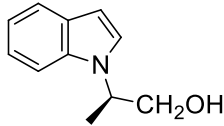

Enantiomeric excess was determined by HPLC analysis: Daicel

Chiralcel AS-H, hexane/*i*PrOH = 95:5, flow rate = 1.0 mL/min,  $\lambda$  = 220 nm,  $t_{\text{major}}$  = 13.0 min,  $t_{\text{minor}}$  = 15.3 min

Data File E:\DATA\WB\WB-20160506\DAD-AS-95-5-WB-20160506 2016-05-06 13-05-45\020-0201.D  
 Sample Name: weib-20160506-6

```

=====
Acq. Operator   : SYSTEM                      Seq. Line :    2
Acq. Instrument : 1260HPLC-DAD                 Location  : Vial 20
Injection Date  : 5/6/2016 1:17:48 PM          Inj       :    1
                                           Inj Volume: 8.000 µl
Acq. Method     : E:\DATA\WB\WB-20160506\DAD-AS-95-5-WB-20160506 2016-05-06 13-05-45\DAD-
AS(1-6)-95-5-1ML-254-8U-40MIN.M
Last changed    : 5/6/2016 1:31:30 PM by SYSTEM
                 (modified after loading)
Analysis Method : E:\DATA\WB\WB-20160506\DAD-AS-95-5-WB-20160506 2016-05-06 13-05-45\DAD-
AS(1-6)-95-5-1ML-254-8U-40MIN.M (Sequence Method)
Last changed    : 5/7/2016 10:55:53 AM by SYSTEM
                 (modified after loading)
Additional Info : Peak(s) manually integrated
  
```

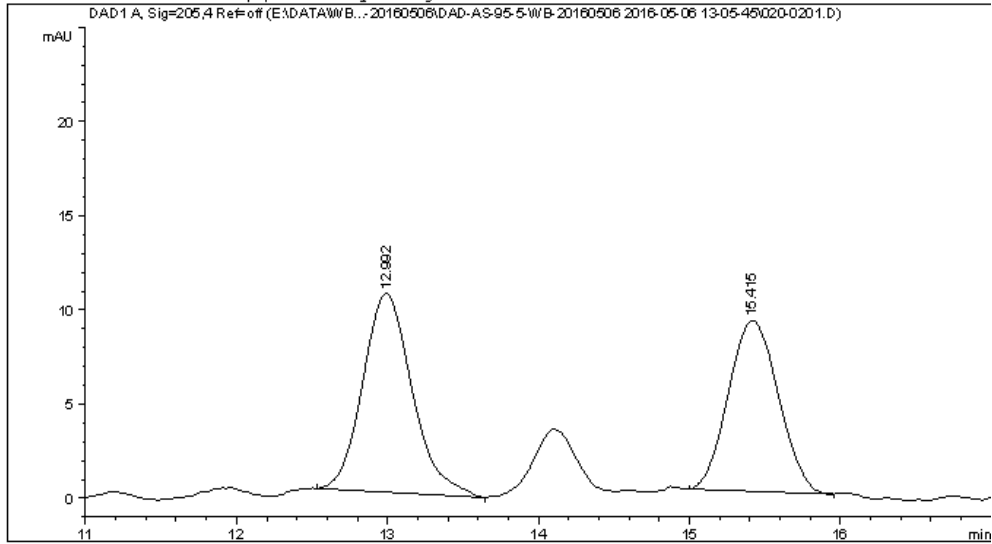

=====  
 Area Percent Report  
 =====

```

Sorted By      :      Signal
Multiplier     :      1.0000
Dilution       :      1.0000
Do not use Multiplier & Dilution Factor with ISTDs
  
```

Signal 1: DAD1 A, Sig=205,4 Ref=off

| Peak # | RetTime [min] | Type | Width [min] | Area [mAU*s] | Height [mAU] | Area %  |
|--------|---------------|------|-------------|--------------|--------------|---------|
| 1      | 12.992        | BB   | 0.3334      | 239.86397    | 10.54427     | 53.5207 |
| 2      | 15.415        | BB   | 0.3145      | 208.30688    | 9.05233      | 46.4793 |

Totals :                    448.17085   19.59660

Data File E:\DATA\WB\WB-20160506\DAD-AS-95-5-WB-20160506 2016-05-06 13-38-58\020-0201.D  
 Sample Name: weib-20160506-8

```

=====
Acq. Operator   : SYSTEM                      Seq. Line :    2
Acq. Instrument : 1260HPLC-DAD                Location  : Vial 20
Injection Date  : 5/6/2016 1:51:00 PM         Inj       :    1
                                           Inj Volume: 8.000 µl
Acq. Method     : E:\DATA\WB\WB-20160506\DAD-AS-95-5-WB-20160506 2016-05-06 13-38-58\DAD-
                  AS(1-6)-95-5-1ML-254-8U-40MIN.M
Last changed    : 5/6/2016 1:38:59 PM by SYSTEM
Analysis Method : E:\DATA\WB\WB-20160506\DAD-AS-95-5-WB-20160506 2016-05-06 13-38-58\DAD-
                  AS(1-6)-95-5-1ML-254-8U-40MIN.M (Sequence Method)
Last changed    : 5/7/2016 10:47:22 AM by SYSTEM
                  (modified after loading)
Additional Info : Peak(s) manually integrated
  
```

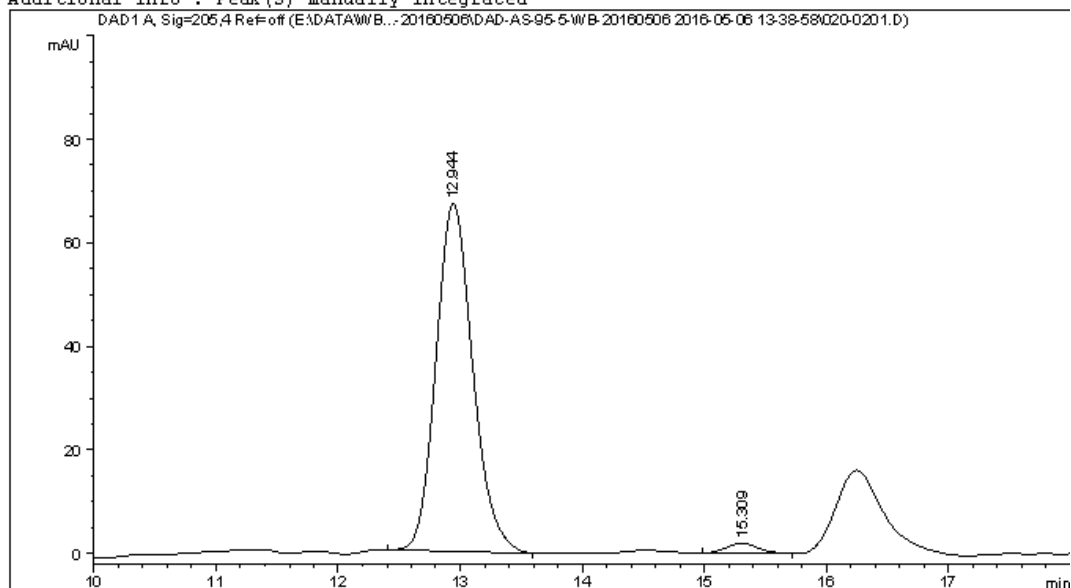

=====  
 Area Percent Report  
 =====

```

Sorted By      :      Signal
Multiplier     :      1.0000
Dilution      :      1.0000
Do not use Multiplier & Dilution Factor with ISTDs
  
```

Signal 1: DAD1 A, Sig=205,4 Ref=off

| Peak # | RetTime [min] | Type | Width [min] | Area [mAU*s] | Height [mAU] | Area %  |
|--------|---------------|------|-------------|--------------|--------------|---------|
| 1      | 12.944        | BB   | 0.3205      | 1408.20715   | 67.19543     | 97.4761 |
| 2      | 15.309        | BB   | 0.2303      | 36.46145     | 2.00360      | 2.5239  |

Totals :                    1444.66860    69.19904

=====  
 \*\*\* End of Report \*\*\*

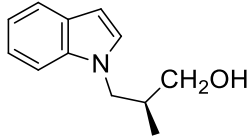

Enantiomeric excess was determined by HPLC analysis: Daicel

Chiralcel OD-H, hexane/*i*PrOH = 95:5, flow rate = 1.0 mL/min,  $\lambda$  = 220 nm,  $t_{\text{minor}}$  = 26.6 min,  $t_{\text{major}}$  = 32.9 min

Data File E:\DATA\WB...20160302\DAD-AD1-2-90-10-WB-20160302 2016-03-02 11-48-14\039-0501.D  
 Sample Name: weib-20160302-3

```

=====
Acq. Operator   : SYSTEM                      Seq. Line :    5
Acq. Instrument : 1260HPLC-VWD                Location  : Vial 39
Injection Date  : 3/2/2016 1:52:17 PM        Inj       :    1
                                           Inj Volume: 5.000 µl
Acq. Method     : E:\DATA\WB\WB-20160302\DAD-AD1-2-90-10-WB-20160302 2016-03-02 11-48-14
                                           \VWD-OD(1-2)-95-5-1ML-220NM-40MIN.M
Last changed    : 3/2/2016 11:48:15 AM by SYSTEM
Analysis Method : E:\DATA\WB\WB-20160302\DAD-AD1-2-90-10-WB-20160302 2016-03-02 11-48-14
                                           \VWD-OD(1-2)-95-5-1ML-220NM-40MIN.M (Sequence Method)
Last changed    : 3/27/2016 2:08:01 PM by SYSTEM
                                           (modified after loading)
Additional Info : Peak(s) manually integrated
  
```

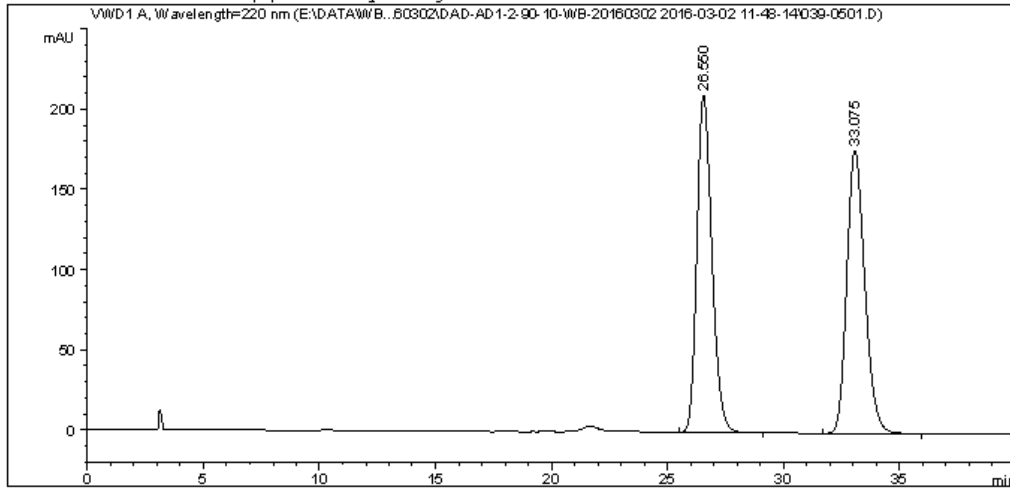

=====  
 Area Percent Report  
 =====

```

Sorted By       : Signal
Multiplier      : 1.0000
Dilution        : 1.0000
Do not use Multiplier & Dilution Factor with ISTDs
  
```

Signal 1: VWD1 A, Wavelength=220 nm

| Peak # | RetTime [min] | Type | Width [min] | Area [mAU*s] | Height [mAU] | Area %  |
|--------|---------------|------|-------------|--------------|--------------|---------|
| 1      | 26.550        | BB   | 0.6942      | 9477.07715   | 210.51416    | 49.8747 |
| 2      | 33.075        | BB   | 0.8310      | 9524.70605   | 176.67365    | 50.1253 |

Totals : 1.90018e4 387.18781

=====  
 \*\*\* End of Report \*\*\*



Data File E:\DATA\WB...20160302\DAD-AD1-2-90-10-WB-20160302 2016-03-02 11-48-14\040-0601.D  
Sample Name: weib-20160302-4

```
=====
Acq. Operator   : SYSTEM                      Seq. Line :    6
Acq. Instrument : 1260HPLC-VWD                Location  : Vial 40
Injection Date  : 3/2/2016 2:33:04 PM         Inj       :    1
                                           Inj Volume: 5.000 µl
Acq. Method     : E:\DATA\WB\WB-20160302\DAD-AD1-2-90-10-WB-20160302 2016-03-02 11-48-14
                  \VWD-OD(1-2)-95-5-1ML-220NM-40MIN.M
Last changed    : 3/2/2016 11:48:15 AM by SYSTEM
Analysis Method : E:\DATA\WB\WB-20160302\DAD-AD1-2-90-10-WB-20160302 2016-03-02 11-48-14
                  \VWD-OD(1-2)-95-5-1ML-220NM-40MIN.M (Sequence Method)
Last changed    : 3/27/2016 2:09:57 PM by SYSTEM
                  (modified after loading)
Additional Info : Peak(s) manually integrated
=====
```

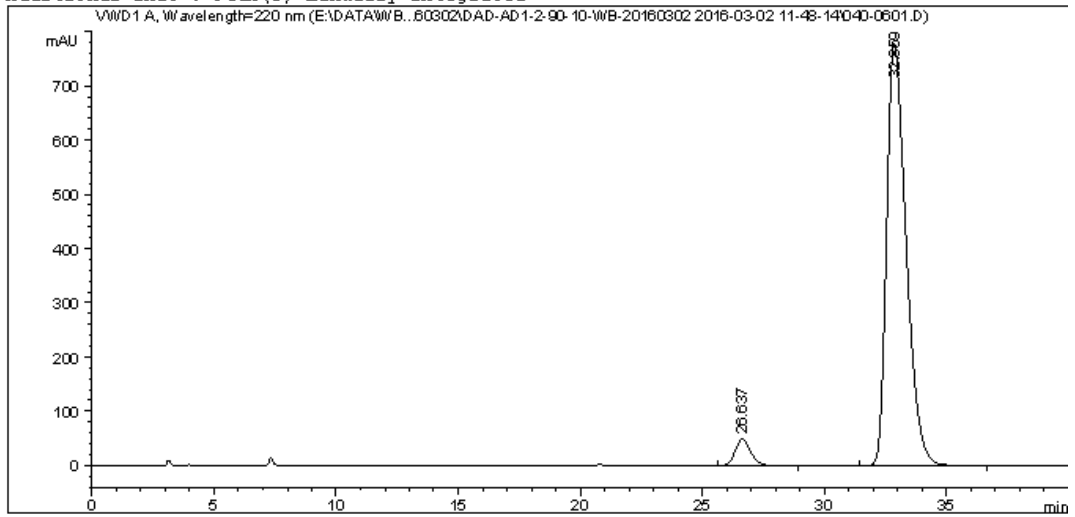

```
=====
Area Percent Report
=====
```

```
Sorted By      : Signal
Multiplier     : 1.0000
Dilution       : 1.0000
Do not use Multiplier & Dilution Factor with ISTDs
```

Signal 1: VWD1 A, Wavelength=220 nm

| Peak # | RetTime [min] | Type | Width [min] | Area [mAU*s] | Height [mAU] | Area %  |
|--------|---------------|------|-------------|--------------|--------------|---------|
| 1      | 26.637        | BB   | 0.6864      | 2193.65039   | 49.26874     | 4.8387  |
| 2      | 32.859        | BB   | 0.8560      | 4.31416e4    | 777.94818    | 95.1613 |

Totals :                    4.53353e4   827.21692

```
=====
*** End of Report ***
=====
```

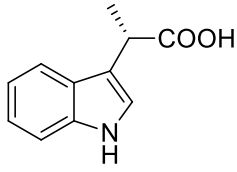

Enantiomeric excess was determined by HPLC analysis: Daicel

Chiralcel IC, hexane/*i*-PrOH = 90:10, flow rate = 0.5 mL/min,  $\lambda = 220$  nm, 40°C,  $t_{\text{major}} = 18.3$  min,  $t_{\text{minor}} = 26.7$  min

Data File E:\DATA\WB\WB-20160525\VWD-IC-90-10-WB-20160525 2016-05-25 11-33-20\029-0201.D  
 Sample Name: weib-20160525-3

```

=====
Acq. Operator   : SYSTEM                      Seq. Line :    2
Acq. Instrument : 1260HPLC-VWD                 Location  : Vial 29
Injection Date  : 5/25/2016 11:45:02 AM      Inj       :    1
                                           Inj Volume: 5.000 µl
Acq. Method     : E:\DATA\WB\WB-20160525\VWD-IC-90-10-WB-20160525 2016-05-25 11-33-20\VWD-
                  IC-90-10-0.5ML-40MIN-40DU-(1-2).M
Last changed    : 5/25/2016 11:33:20 AM by SYSTEM
Analysis Method : E:\DATA\WB\WB-20160525\VWD-IC-90-10-WB-20160525 2016-05-25 11-33-20\VWD-
                  IC-90-10-0.5ML-40MIN-40DU-(1-2).M (Sequence Method)
Last changed    : 5/28/2016 11:15:57 AM by SYSTEM
                  (modified after loading)
Additional Info : Peak(s) manually integrated
  
```

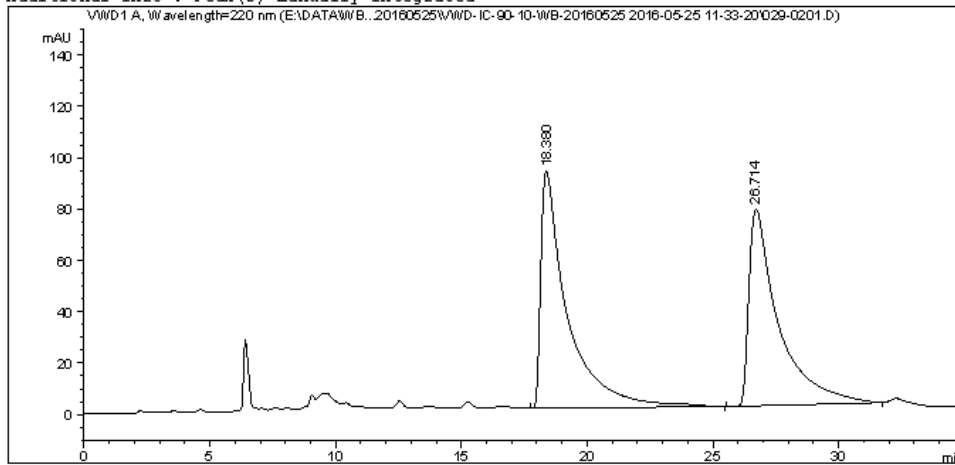

=====  
 Area Percent Report  
 =====

```

Sorted By      :      Signal
Multiplier     :      1.0000
Dilution      :      1.0000
Do not use Multiplier & Dilution Factor with ISTDs
  
```

Signal 1: VWD1 A, Wavelength=220 nm

| Peak # | RetTime [min] | Type | Width [min] | Area [mAU*s] | Height [mAU] | Area %  |
|--------|---------------|------|-------------|--------------|--------------|---------|
| 1      | 18.380        | BB   | 1.0032      | 6739.29395   | 92.25677     | 51.8738 |
| 2      | 26.714        | BB   | 1.1316      | 6252.40527   | 76.81479     | 48.1262 |

Totals :                    1.29917e4   169.07156

=====  
 \*\*\* End of Report \*\*\*

```
=====
Acq. Operator   : SYSTEM                      Seq. Line :    2
Acq. Instrument : 1260HPLC-VWD                Location  : Vial 30
Injection Date  : 5/25/2016 4:53:00 PM        Inj       :    1
                                           Inj Volume: 5.000 µl
Acq. Method     : E:\DATA\WB\WB-20160525\VWD-IC-90-10-WB-20160525 2016-05-25 16-38-14\VWD-
                  IC-90-10-0.5ML-40MIN-40DU-(1-2).M
Last changed    : 5/25/2016 4:38:15 PM by SYSTEM
Analysis Method : E:\DATA\WB\WB-20160525\VWD-IC-90-10-WB-20160525 2016-05-25 16-38-14\VWD-
                  IC-90-10-0.5ML-40MIN-40DU-(1-2).M (Sequence Method)
Last changed    : 5/28/2016 11:09:55 AM by SYSTEM
                  (modified after loading)
Additional Info  : Peak(s) manually integrated
=====
```

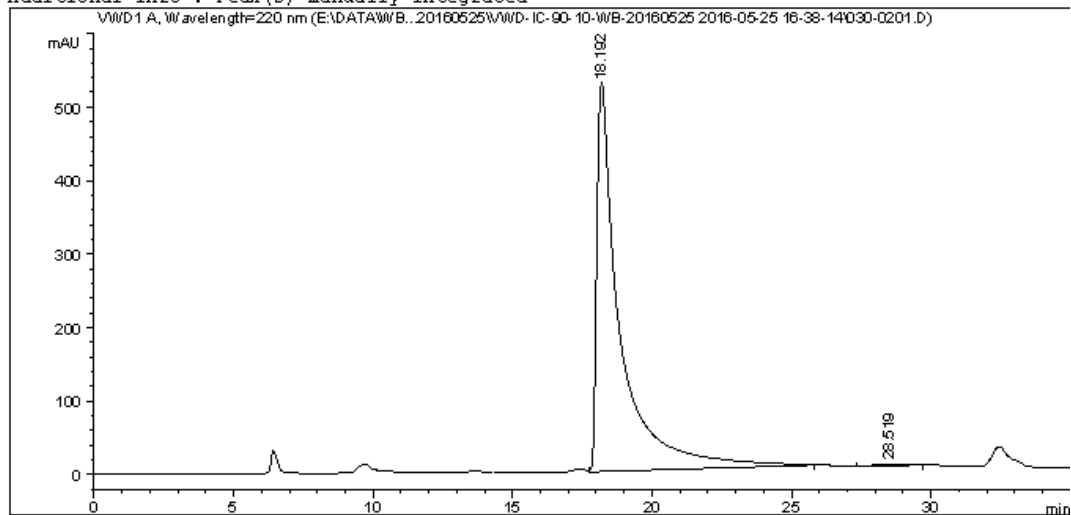

=====  
Area Percent Report  
=====

Sorted By : Signal  
Multiplier : 1.0000  
Dilution : 1.0000  
Do not use Multiplier & Dilution Factor with ISTDs

Signal 1: VWD1 A, Wavelength=220 nm

| Peak # | RetTime [min] | Type | Width [min] | Area [mAU*s] | Height [mAU] | Area %  |
|--------|---------------|------|-------------|--------------|--------------|---------|
| 1      | 18.192        | VB   | 0.7872      | 3.07941e4    | 529.73083    | 99.5989 |
| 2      | 28.519        | BB   | 0.8131      | 124.02528    | 1.81080      | 0.4011  |

Totals : 3.09181e4 531.54163

=====  
\*\*\* End of Report \*\*\*
